# Supplementary material
Source: PubMed Central journal article supplement (PMC6057826)
Supplement: NIHMS971486-supplement.pdf [file NIHMS971486-supplement.pdf]

## **SUPPLEMENTAL MATERIAL:**

### **Oral ibuprofen differentially affects plasma and sweat lipid mediator profiles in healthy adult males**

Karan Agrawal<sup>a,b</sup>, Rémy Bosviel<sup>b</sup>, Brian D. Piccolo<sup>c,d</sup>, John W. Newman<sup>a,b,e,\*</sup>

<sup>a</sup> Department of Nutrition, University of California-Davis, One Shields Avenue, Davis, CA 95616, USA

<sup>b</sup> West Coast Metabolomics Center, University of California-Davis Genome Center, 451 Health Sciences Drive, Davis, CA 95616, USA

<sup>c</sup> Arkansas Children's Nutrition Center, 15 Children's Way, Little Rock, AR 72202, USA

<sup>d</sup> Department of Pediatrics, University of Arkansas for Medical Sciences, 4301 W Markham Street, Little Rock, AR 72205, USA

<sup>e</sup> United States Department of Agriculture, Agricultural Research Service, Western Human Nutrition Research Center, 430 W Health Sciences Drive, Davis, CA 95616, USA

\* *Corresponding author:* USDA-ARS-Western Human Nutrition Research Center, 430 W Health Sciences Drive, Davis, CA 95616, USA

*Email Address:* john.newman@ars.usda.gov

Supplemental Figure S1

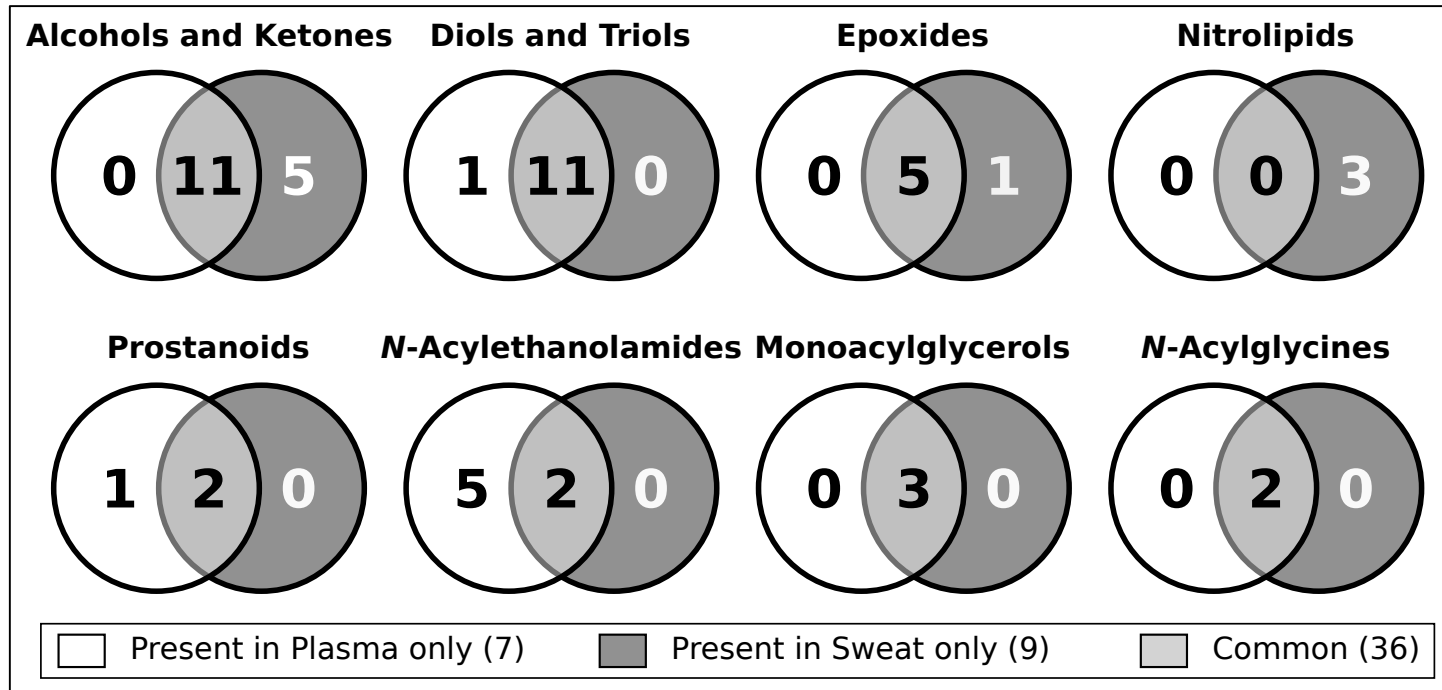

**Supplemental Fig. S1. Plasma and sweat demonstrate different lipid mediator profiles.** Of the 43 lipid mediators detected in plasma and 45 lipid mediators detected in sweat, 36 are common to both matrices and 16 are unique. Despite this considerable overlap in lipid mediator profiles, individual plasma and sweat lipid mediators do not appear to be correlated, and relative abundances of lipid mediator classes as well as class-specific relative abundances of individual lipid mediator isomers derived from the same fatty acid precursor are different, which suggests the origins of lipid mediators are different in each matrix.

## Supplemental Figure S2

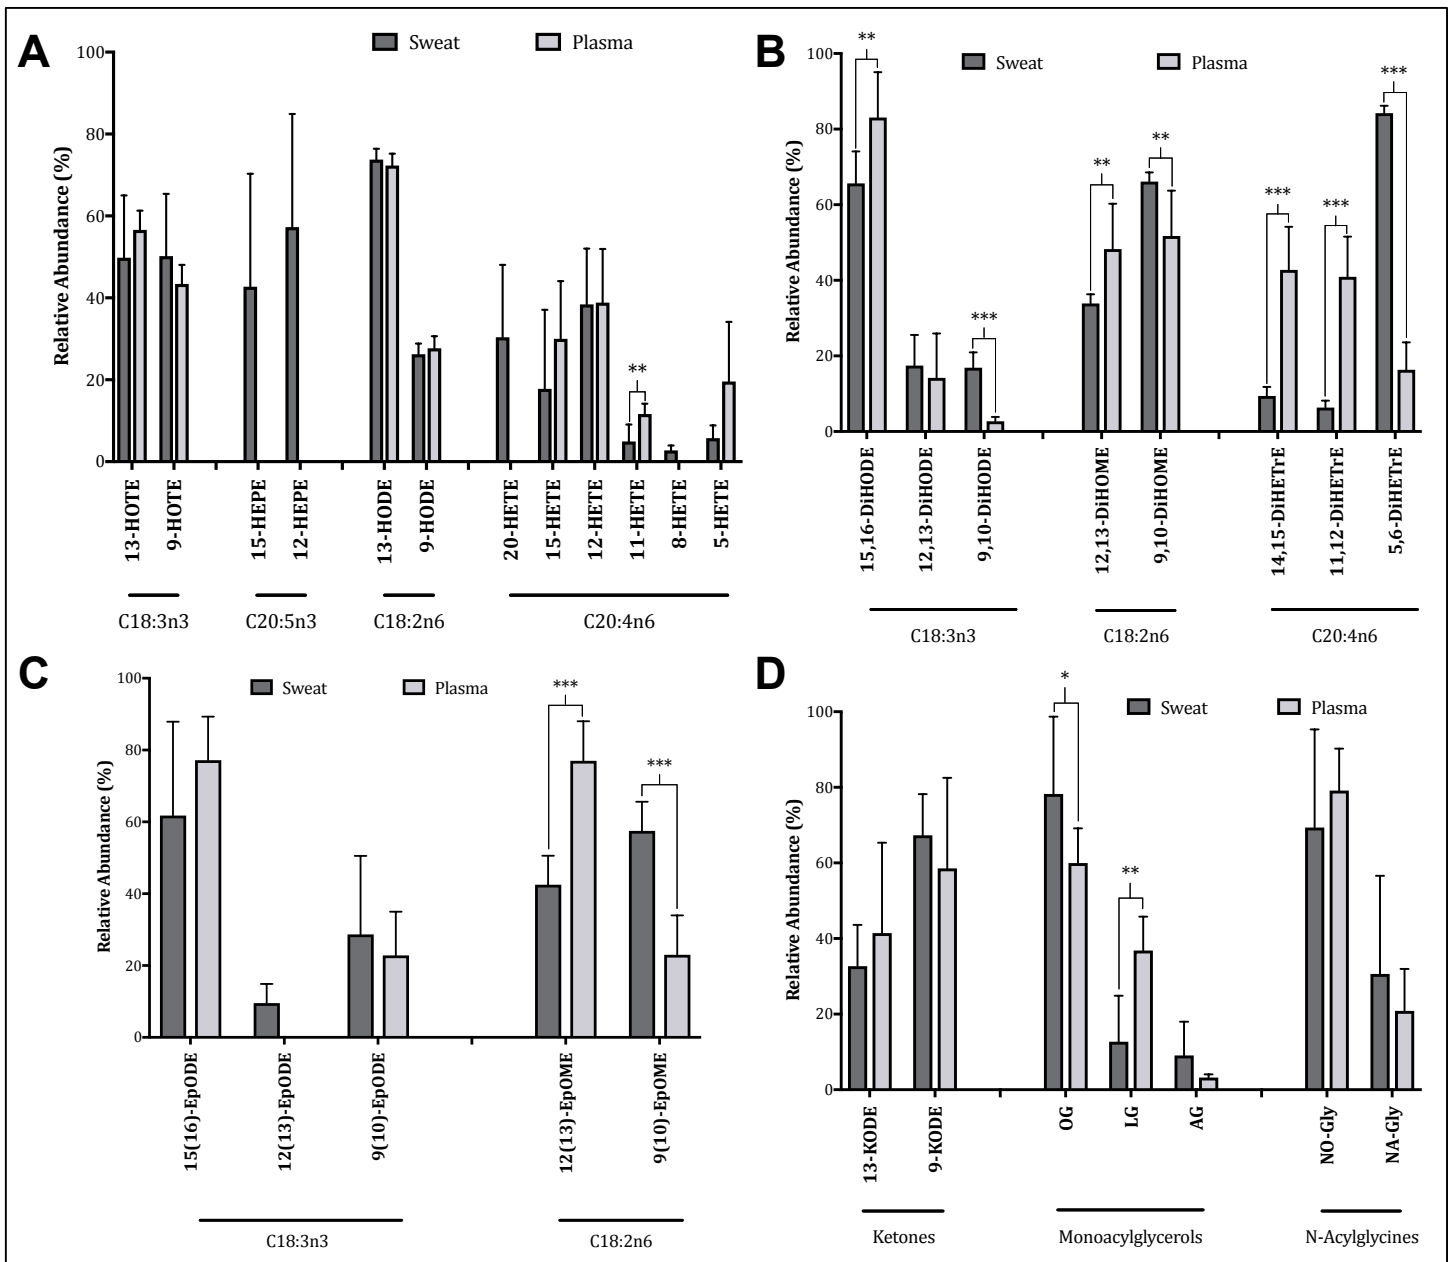

**Supplemental Fig. S2. Class-specific relative abundances of lipid mediator isomers derived from the same fatty acid precursor demonstrate differences at baseline.** (A) Alcohols derived from arachidonate demonstrate increased proportions of 11-hydroxyeicosatetraenoic acid (HETE) in plasma, and 20-HETE and 8-HETE are detectable in sweat but not plasma. (B) Diols derived from  $\alpha$ -linolenate, linoleate and arachidonate demonstrate isomeric differences in sweat and plasma. (C) Epoxides derived from linoleate demonstrate isomeric differences in sweat and plasma. (D) While no differences were observed in plasma and sweat ketone or N-acylglycerine proportions, plasma was enriched in oleoylglycerol whereas sweat was enriched in linoleoylglycerol. Data are reported as arithmetic mean  $\pm$  standard deviation ( $n = 8$ ), and matrix differences were evaluated using Wilcoxon's rank-sum exact tests. \*  $P < 0.05$ ; \*\*  $P < 0.005$ ; \*\*\*  $P < 0.0005$ .

## Supplemental Figure S3

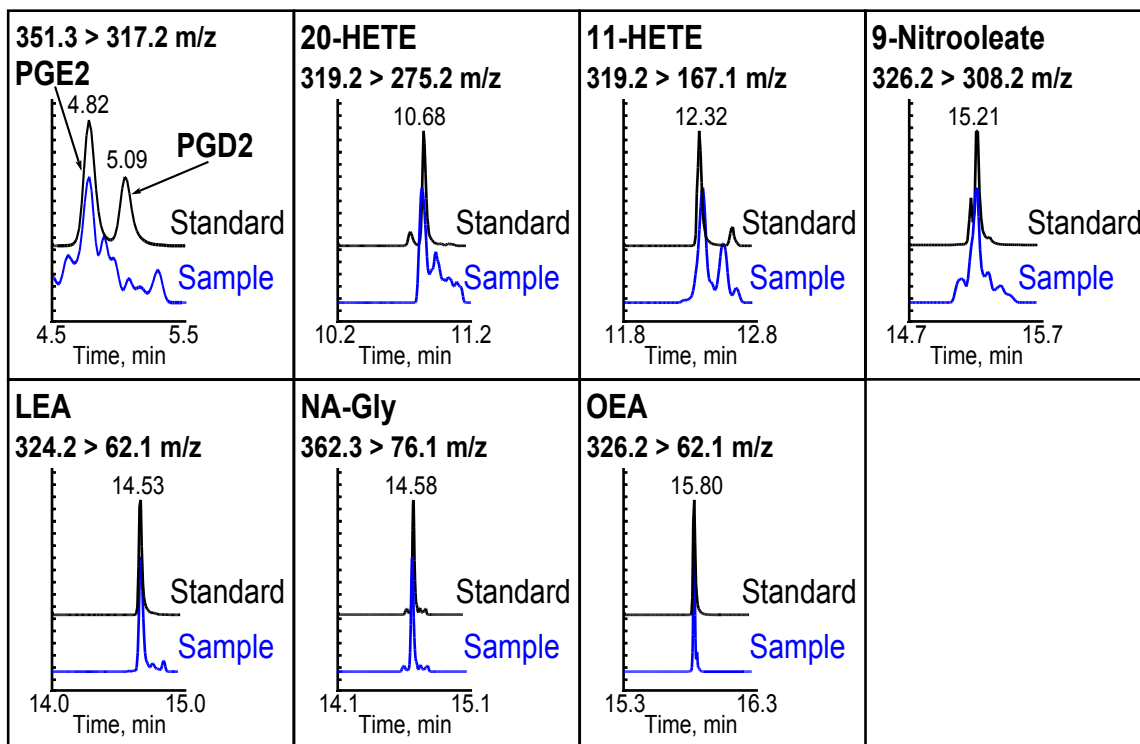

**Supplemental Fig. S3. Representative chromatograms of sweat lipid mediators affected by oral consumption of 400 mg ibuprofen.** Extracted ion chromatograms acquired following UPLC-MS/MS analysis indicate detected analytes in a representative sweat sample obtained from a subject and are overlaid with extracted ion chromatograms from the representative standard to demonstrate appropriateness of peak selection in the samples.

## Supplemental Table S1

**Supplemental Table S1.** Baseline physiological characteristics and exercise parameters of study participants. Values are reported as either Arithmetic Mean  $\pm$  SD or Geometric Mean [Range].

| Parameter                            | Observed Value<br>(n = 9) |
|--------------------------------------|---------------------------|
| Age (yr)                             | 27.6 $\pm$ 2.9            |
| Height (cm)                          | 180.6 $\pm$ 6.9           |
| Weight (kg)                          | 82.4 $\pm$ 14.0           |
| Body Mass Index (kg/m <sup>2</sup> ) | 25.3 $\pm$ 4.6            |
| Sweat Volume Collected ( $\mu$ L)    |                           |
| Baseline (0 hr)                      | 45 [9 - 105]              |
| 0.5 hr after Ibuprofen intake        | 43 [14 - 93]              |
| 2 hr after Ibuprofen intake          | 75 [44 - 95]              |
| 4 hr after Ibuprofen intake          | 48 [11 - 137]             |

Supplemental Table S2

**Supplemental Table S2A.** Mobile phase gradient conditions for the analysis of oxylipins, nitrolipids, free fatty acids, endocannabinoids and endocannabinoid-like compounds by UPLC-MS/MS. A Waters Acquity UPLC<sup>®</sup> BEH C18 2.1 x 150 mm, 1.7 μm column was used to separate analytes and column temperature was maintained at 60°C.

| Time (min) | Mobile Phase A <sup>a</sup> (%) | Mobile Phase B <sup>b</sup> (%) | Flow Rate (mL/min) |
|------------|---------------------------------|---------------------------------|--------------------|
| 0.00       | 75                              | 25                              | 0.25               |
| 1.00       | 60                              | 40                              | 0.25               |
| 2.50       | 58                              | 42                              | 0.25               |
| 4.50       | 50                              | 50                              | 0.25               |
| 10.50      | 35                              | 65                              | 0.25               |
| 12.50      | 25                              | 75                              | 0.25               |
| 13.25      | 20                              | 80                              | 0.25               |
| 17.25      | 15                              | 85                              | 0.25               |
| 18.25      | 5                               | 95                              | 0.25               |
| 18.75      | 0                               | 100                             | 0.25               |
| 19.00      | 0                               | 100                             | 0.25               |
| 19.10      | 75                              | 25                              | 0.25               |
| 20.00      | 75                              | 25                              | 0.25               |

<sup>a</sup> Mobile Phase A: 0.1% Acetic Acid in Water

<sup>b</sup> Mobile Phase B: 90:10 Acetonitrile:Isopropanol

## Supplemental Table S2

Supplemental Table S2B. UPLC/electrospray ionization QTrap analyte and instrument specific parameters for assayed oxylipins, nitrolipids, free fatty acids, endocannabinoids, and endocannabinoid-like compounds

| Lipid Mediator  | Analyte Class | Fatty Acid Precursor | Internal Standard | Retention Time (min) | Electrospray Ionization Mode | Q1 > Q3 Transition (m/z) | Collision Energy (V) | Declustering Potential (V) |
|-----------------|---------------|----------------------|-------------------|----------------------|------------------------------|--------------------------|----------------------|----------------------------|
| Aspirin         | NSAID         |                      | d4-Aspirin        | 2.84                 | Negative                     | 178.8 > 137.2            | -18                  | -35                        |
| d4-Aspirin      | SSTD          |                      | PHAU -esi         | 2.85                 | Negative                     | 182.9 > 140.9            | -18                  | -45                        |
| PHAU -esi       | ISTD          |                      |                   | 3.07                 | Negative                     | 249.2 > 130.1            | -18                  | -30                        |
| 6-keto PGF1a    | Prostanoid    | C20:4n6              | d4-PGF2a          | 3.43                 | Negative                     | 369.3 > 163.1            | -33                  | -70                        |
| d4-6-Keto PGF1a | SSTD          |                      | PHAU -esi         | 3.45                 | Negative                     | 373.3 > 167.1            | -36                  | -70                        |
| PGF3a           | Prostanoid    | C20:5n3              | d4-PGF2a          | 4.03                 | Negative                     | 351.3 > 307.4            | -24                  | -60                        |
| PGE3            | Prostanoid    | C20:5n3              | d4-PGF2a          | 4.18                 | Negative                     | 349.3 > 269.2            | -21                  | -35                        |
| TXB2            | Prostanoid    | C20:4n6              | d4-TXB2           | 4.48                 | Negative                     | 369.3 > 169.1            | -21                  | -50                        |
| d4-TXB2         | SSTD          |                      | PHAU -esi         | 4.55                 | Negative                     | 373.3 > 173.1            | -45                  | -50                        |
| Sum TriHOMEs    | Triol         | C18:2n6              | d4-PGF2a          | 4.73                 | Negative                     | 329.2 > 211.2            | -30                  | -60                        |
| d4-PGF2a        | SSTD          |                      | PHAU -esi         | 4.77                 | Negative                     | 357.3 > 197.2            | -33                  | -70                        |
| PGF2a           | Prostanoid    | C20:4n6              | d4-PGF2a          | 4.78                 | Negative                     | 353.3 > 193.2            | -33                  | -70                        |
| PGE2            | Prostanoid    | C20:4n6              | d4-PGD2           | 4.89                 | Negative                     | 351.302 > 271.2          | -21                  | -40                        |
| PGE1            | Prostanoid    | C20:3n6              | d4-PGD2           | 5.06                 | Negative                     | 353.3 > 317.2            | -18                  | -40                        |
| d4-PGD2         | SSTD          |                      | PHAU -esi         | 5.17                 | Negative                     | 355.3 > 275.2            | -27                  | -40                        |
| PGD2            | Prostanoid    | C20:4n6              | d4-PGD2           | 5.18                 | Negative                     | 351.303 > 271.2          | -24                  | -40                        |
| 15-Keto PGE2    | Prostanoid    | C20:4n6              | d4-PGF2a          | 5.22                 | Negative                     | 349.2 > 331.3            | -15                  | -50                        |
| Naproxen        | NSAID         |                      | d3-Naproxen       | 5.50                 | Negative                     | 229.0 > 185.0            | -12                  | -35                        |
| d3-Naproxen     | SSTD          |                      | PHAU -esi         | 5.50                 | Negative                     | 232.0 > 188.0            | -9                   | -35                        |
| Resolvin D1     | Triol         | C22:6n3              | d4-PGF2a          | 5.69                 | Negative                     | 375.3 > 121.1            | -39                  | -60                        |
| Lipoxin A4      | Triol         | C20:4n6              | d4-PGF2a          | 5.80                 | Negative                     | 351.3 > 217.2            | -27                  | -45                        |
| LTB5            | Leukotriene   | C20:5n3              | d4-PGF2a          | 6.89                 | Negative                     | 333.3 > 195.2            | -21                  | -50                        |
| 15,16-DiHODE    | Diol          | C18:3n3              | d11-14,15-DiHETE  | 7.38                 | Negative                     | 311.2 > 235.2            | -27                  | -55                        |
| 12,13-DiHODE    | Diol          | C18:3n3              | d11-14,15-DiHETE  | 7.47                 | Negative                     | 311.2 > 183.2            | -27                  | -60                        |
| 8,15-DiHETE     | Diol          | C20:5n3              | d11-14,15-DiHETE  | 7.48                 | Negative                     | 335.3 > 235.2            | -21                  | -65                        |
| 9,10-DiHODE     | Diol          | C18:3n3              | d11-14,15-DiHETE  | 7.52                 | Negative                     | 311.2 > 201.2            | -27                  | -65                        |
| d4-LTB4         | SSTD          |                      | CUDA -esi         | 7.62                 | Negative                     | 339.3 > 163.1            | -33                  | -70                        |
| 17,18-DiHETE    | Diol          | C20:5n3              | d11-14,15-DiHETE  | 7.75                 | Negative                     | 335.3 > 247.2            | -24                  | -70                        |

ISTD - Internal Standard. This compound is added to the samples at the reconstitution step

SSTD - Surrogate. This compound is added to the samples prior to extraction

## Supplemental Table S2

Supplemental Table S2B. UPLC/electrospray ionization QTrap analyte and instrument specific parameters for assayed oxylipins, nitrolipids, free fatty acids, endocannabinoids, and endocannabinoid-like compounds

| Lipid Mediator    | Analyte Class | Fatty Acid Precursor | Internal Standard | Retention Time (min) | Electrospray Ionization Mode | Q1 > Q3 Transition (m/z) | Collision Energy (V) | Declustering Potential (V) |
|-------------------|---------------|----------------------|-------------------|----------------------|------------------------------|--------------------------|----------------------|----------------------------|
| 5,15-DiHETE       | Diol          | C20:5n3              | d11-14,15-DiHETrE | 7.75                 | Negative                     | 335.3 > 173.1            | -18                  | -40                        |
| Diclofenac        | NSAID         |                      | d4-Diclofenac     | 7.78                 | Negative                     | 294.1 > 250.1            | -18                  | -35                        |
| d4-Diclofenac     | SSTD          |                      | CUDA -esi         | 7.78                 | Negative                     | 300.1 > 256.1            | -18                  | -35                        |
| 6-trans-LTB4      | Leukotriene   | C20:4n6              | d11-14,15-DiHETrE | 7.79                 | Negative                     | 335.301 > 195.2          | -21                  | -85                        |
| 14,15-DiHETE      | Diol          | C20:5n3              | d11-14,15-DiHETrE | 8.42                 | Negative                     | 335.3 > 207.2            | -24                  | -40                        |
| CUDA -esi         | ISTD          |                      |                   | 8.45                 | Negative                     | 339.4 > 214.2            | -30                  | -70                        |
| LTB4              | Leukotriene   | C20:4n6              | d11-14,15-DiHETrE | 8.50                 | Negative                     | 335.302 > 195.2          | -24                  | -50                        |
| 10,11-DHHep       | SSTD          |                      | CUDA -esi         | 8.80                 | Negative                     | 301.2 > 283.2            | -30                  | -90                        |
| 12,13-DiHOME      | Diol          | C18:2n6              | d11-14,15-DiHETrE | 8.81                 | Negative                     | 313.3 > 183.2            | -30                  | -70                        |
| Ibuprofen         | NSAID         |                      | d3-Ibuprofen      | 8.88                 | Negative                     | 205.1 > 161.1            | -9                   | -50                        |
| d3-Ibuprofen      | SSTD          |                      | CUDA -esi         | 8.88                 | Negative                     | 208.0 > 164.0            | -9                   | -55                        |
| 9,10-DiHOME       | Diol          | C18:2n6              | d11-14,15-DiHETrE | 9.23                 | Negative                     | 313.3 > 201.2            | -27                  | -65                        |
| d11-14,15-DiHETrE | SSTD          |                      | CUDA -esi         | 9.42                 | Negative                     | 348.4 > 207.2            | -24                  | -65                        |
| 19,20-DiHDoPE     | Diol          | C22:6n3              | d11-14,15-DiHETrE | 9.46                 | Negative                     | 361.3 > 273.2            | -24                  | -80                        |
| 14,15-DiHETrE     | Diol          | C20:4n6              | d11-14,15-DiHETrE | 9.49                 | Negative                     | 337.3 > 207.2            | -24                  | -60                        |
| 11,12-DiHETrE     | Diol          | C20:4n6              | d11-14,15-DiHETrE | 10.10                | Negative                     | 337.3 > 167.1            | -27                  | -55                        |
| 9,10-e-DiHO       | Diol          | C18:0                | d11-14,15-DiHETrE | 10.23                | Negative                     | 315.2 > 297.2            | -30                  | -110                       |
| 12,13-Ep-9-KODE   | Ketone        | C18:3n3              | d11-14,15-DiHETrE | 10.39                | Negative                     | 309.2 > 291.2            | -21                  | -90                        |
| 9-HOTrE           | Alcohol       | C18:3n3              | d4-9(S)-HODE      | 10.42                | Negative                     | 293.2 > 171.1            | -21                  | -60                        |
| 13-HOTrE          | Alcohol       | C18:3n3              | d4-9(S)-HODE      | 10.50                | Negative                     | 293.2 > 195.2            | -24                  | -70                        |
| 8,9-DiHETrE       | Diol          | C20:4n6              | d11-14,15-DiHETrE | 10.59                | Negative                     | 337.3 > 127.1            | -27                  | -65                        |
| 15-deoxy PGJ2     | Prostanoid    | C20:4n6              | d11-14,15-DiHETrE | 10.66                | Negative                     | 315.2 > 271.2            | -21                  | -50                        |
| d6-20-HETE        | SSTD          |                      | CUDA -esi         | 10.81                | Negative                     | 325.3 > 281.2            | -21                  | -80                        |
| 20-HETE           | Alcohol       | C20:4n6              | d6-20-HETE        | 10.85                | Negative                     | 319.2 > 275.2            | -24                  | -95                        |
| 15-HEPE           | Alcohol       | C20:5n3              | d8-12(S)-HETE     | 10.95                | Negative                     | 317.2 > 219.2            | -18                  | -55                        |
| 12-HEPE           | Alcohol       | C20:5n3              | d8-12(S)-HETE     | 11.22                | Negative                     | 317.2 > 179.1            | -18                  | -45                        |
| 5,6-DiHETrE       | Diol          | C20:4n6              | d11-14,15-DiHETrE | 11.37                | Negative                     | 337.3 > 145.1            | -24                  | -55                        |
| 9-HEPE            | Alcohol       | C20:5n3              | d4-9(S)-HODE      | 11.43                | Negative                     | 317.201 > 167.2          | -18                  | -45                        |

ISTD - Internal Standard. This compound is added to the samples at the reconstitution step

SSTD - Surrogate. This compound is added to the samples prior to extraction



## Supplemental Table S2

Supplemental Table S2B. UPLC/electrospray ionization QTrap analyte and instrument specific parameters for assayed oxylipins, nitrolipids, free fatty acids, endocannabinoids, and endocannabinoid-like compounds

| Lipid Mediator  | Analyte Class     | Fatty Acid Precursor | Internal Standard | Retention Time (min) | Electrospray Ionization Mode | Q1 > Q3 Transition (m/z) | Collision Energy (V) | Decustering Potential (V) |
|-----------------|-------------------|----------------------|-------------------|----------------------|------------------------------|--------------------------|----------------------|---------------------------|
| 13-HODE         | Alcohol           | C18:2n6              | d4-9(S)-HODE      | 11.72                | Negative                     | 295.201 > 195.2          | -24                  | -90                       |
| 5-HEPE          | Alcohol           | C20:5n3              | d8-5(S)-HETE      | 11.91                | Negative                     | 317.2 > 115.1            | -21                  | -40                       |
| 9-HODE          | Alcohol           | C18:2n6              | d4-9(S)-HODE      | 11.91                | Negative                     | 295.201 > 171.1          | -24                  | -70                       |
| d4-9,S-HODE     | SSTD              |                      | CUDA -esi         | 11.94                | Negative                     | 299.2 > 172.1            | -27                  | -85                       |
| 15,16-EpODE     | Epoxide           | C18:3n3              | d4-12,13-EpOME    | 12.00                | Negative                     | 293.201 > 275.2          | -18                  | -75                       |
| 15-HETE         | Alcohol           | C20:4n6              | d8-12(S)-HETE     | 12.10                | Negative                     | 319.201 > 219.2          | -18                  | -55                       |
| 13-KODE         | Ketone            | C18:2n6              | d4-9(S)-HODE      | 12.18                | Negative                     | 293.2 > 179.1            | -27                  | -80                       |
| 9,10-EpODE      | Epoxide           | C18:3n3              | d4-12,13-EpOME    | 12.19                | Negative                     | 293.202 > 275.2          | -18                  | -65                       |
| 17,18-EpETE     | Epoxide           | C20:5n3              | d4-12,13-EpOME    | 12.21                | Negative                     | 317.2 > 259.2            | -15                  | -55                       |
| 17-HDoHE        | Alcohol           | C22:6n3              | d8-12(S)-HETE     | 12.31                | Negative                     | 343.301 > 281.2          | -18                  | -55                       |
| 12,13-EpODE     | Epoxide           | C18:3n3              | d4-12,13-EpOME    | 12.40                | Negative                     | 293.2 > 183.2            | -24                  | -50                       |
| 14-HDoHE        | Alcohol           | C22:6n3              | d8-12(S)-HETE     | 12.52                | Negative                     | 343.302 > 281.2          | -18                  | -60                       |
| 15-HpETE screen | Hydroperoxide     | C20:4n6              | d8-12(S)-HETE     | 12.55                | Negative                     | 335.2 > 113.1            | -24                  | -55                       |
| 11-HETE         | Alcohol           | C20:4n6              | d8-12(S)-HETE     | 12.55                | Negative                     | 319.201 > 167.1          | -21                  | -45                       |
| 14,15-EpETE     | Epoxide           | C20:5n3              | d4-12,13-EpOME    | 12.57                | Negative                     | 317.2 > 247.2            | -18                  | -35                       |
| 15-KETE         | Ketone            | C20:4n6              | d8-12(S)-HETE     | 12.58                | Negative                     | 317.2 > 273.2            | -18                  | -60                       |
| 13-HpODE screen | Hydroperoxide     | C18:2n6              | d4-9(S)-HODE      | 12.62                | Negative                     | 311.2 > 179.1            | -24                  | -55                       |
| 9-KODE          | Ketone            | C18:2n6              | d4-9(S)-HODE      | 12.62                | Negative                     | 293.2 > 185.2            | -27                  | -100                      |
| d8-12(S)-HETE   | SSTD              |                      | CUDA -esi         | 12.67                | Negative                     | 327.2 > 184.2            | -21                  | -60                       |
| 11,12-EpETE     | Epoxide           | C20:5n3              | d4-12,13-EpOME    | 12.70                | Negative                     | 317.202 > 167.2          | -18                  | -40                       |
| 9-HpODE screen  | Hydroperoxide     | C18:2n6              | d4-9(S)-HODE      | 12.72                | Negative                     | 311.2 > 185.2            | -24                  | -55                       |
| 12-HETE         | Alcohol           | C20:4n6              | d8-12(S)-HETE     | 12.87                | Negative                     | 319.2 > 179.1            | -21                  | -60                       |
| 12-HpETE screen | Hydroperoxide     | C20:4n6              | d8-12(S)-HETE     | 12.95                | Negative                     | 335.2 > 153.1            | -27                  | -55                       |
| 8-HETE          | Alcohol           | C20:4n6              | d8-12(S)-HETE     | 12.96                | Negative                     | 319.201 > 155.1          | -21                  | -45                       |
| 9-HETE          | Alcohol           | C20:4n6              | d8-12(S)-HETE     | 13.08                | Negative                     | 319.202 > 167.1          | -18                  | -60                       |
| d8-5(S)-HETE    | SSTD              |                      | CUDA -esi         | 13.29                | Negative                     | 327.2 > 116.1            | -18                  | -70                       |
| 5-HpETE screen  | Hydroperoxide     | C20:4n6              | d8-5(S)-HETE      | 13.44                | Negative                     | 335.2 > 155.1            | -24                  | -55                       |
| 19,20-EpDPE     | Epoxide           | C22:6n3              | d4-12,13-EpOME    | 13.47                | Negative                     | 343.303 > 281.2          | -18                  | -60                       |
| 5-HETE          | Alcohol           | C20:4n6              | d8-5(S)-HETE      | 13.48                | Negative                     | 319.2 > 115.1            | -18                  | -50                       |
| d4-12,13-EpOME  | SSTD <sup>c</sup> |                      | CUDA -esi         | 13.54                | Negative                     | 299.2 > 198.1            | -24                  | -90                       |
| 12,13-EpOME     | Epoxide           | C18:2n6              | d4-12,13-EpOME    | 13.63                | Negative                     | 295.202 > 195.2          | -21                  | -85                       |
| 4-HDoHE         | Alcohol           | C22:6n3              | d8-5(S)-HETE      | 13.65                | Negative                     | 343.304 > 281.2          | -18                  | -60                       |

ISTD - Internal Standard. This compound is added to the samples at the reconstitution step

SSTD - Surrogate. This compound is added to the samples prior to extraction

## Supplemental Table S2

Supplemental Table S2B. UPLC/electrospray ionization QTrap analyte and instrument specific parameters for assayed oxylipins, nitrolipids, free fatty acids, endocannabinoids, and endocannabinoid-like compounds

| Lipid Mediator      | Analyte Class     | Fatty Acid Precursor | Internal Standard   | Retention Time (min) | Electrospray Ionization Mode | Q1 > Q3 Transition (m/z) | Collision Energy (V) | Decustering Potential (V) |
|---------------------|-------------------|----------------------|---------------------|----------------------|------------------------------|--------------------------|----------------------|---------------------------|
| 14,15-EpETRE        | Epoxide           | C20:4n6              | d4-12,13-EpOME      | 13.67                | Negative                     | 319.202 > 219.2          | -18                  | -50                       |
| 9,10-EpOME          | Epoxide           | C18:2n6              | d4-12,13-EpOME      | 13.79                | Negative                     | 295.202 > 171.1          | -21                  | -75                       |
| 16,17-EpDPE         | Epoxide           | C22:6n3              | d4-12,13-EpOME      | 13.83                | Negative                     | 343.3 > 273.5            | -15                  | -45                       |
| 5-KETE              | Ketone            | C20:4n6              | d8-5(S)-HETE        | 14.09                | Negative                     | 317.2 > 203.2            | -27                  | -75                       |
| 11,12-EpETRE        | Epoxide           | C20:4n6              | d4-12,13-EpOME      | 14.13                | Negative                     | 319.203 > 167.1          | -21                  | -40                       |
| 8,9-EpETRE          | Epoxide           | C20:4n6              | d4-12,13-EpOME      | 14.25                | Negative                     | 319.202 > 155.1          | -18                  | -40                       |
| 10-Nitrooleate      | Nitrolipid        | C18:2n6              | d17-10-Nitrooleate  | 14.45                | Negative                     | 324.3 > 277.2            | -18                  | -40                       |
| d17-10-Nitrooleate  | SSTD <sup>†</sup> |                      | CUDA -esi           | 15.21                | Negative                     | 343.2 > 307.5            | -18                  | -65                       |
| 10-Nitrooleate      | Nitrolipid        | C18:1n9              | d17-10-Nitrooleate  | 15.30                | Negative                     | 326.2 > 279.5            | -24                  | -40                       |
| EPA screen          | Fatty Acid        |                      | d8-Arachidonic Acid | 15.38                | Negative                     | 301.4 > 257.2            | -15                  | -60                       |
| 9-Nitrooleate       | Nitrolipid        | C18:1n9              | d17-10-Nitrooleate  | 15.40                | Negative                     | 326.2 > 308.2            | -18                  | -50                       |
| ALA screen          | Fatty Acid        |                      | d8-Arachidonic Acid | 15.55                | Negative                     | 277.4 > 259.2            | -24                  | -115                      |
| DHA screen          | Fatty Acid        |                      | d8-Arachidonic Acid | 16.16                | Negative                     | 327.2 > 283.2            | -15                  | -45                       |
| d8-Arachidonic Acid | SSTD              |                      | CUDA -esi           | 16.43                | Negative                     | 311.3 > 267.1            | -18                  | -60                       |
| Arachidonate screen | Fatty Acid        |                      | d8-Arachidonic Acid | 16.50                | Negative                     | 303.4 > 259.2            | -18                  | -40                       |
| Linoleate screen    | Fatty Acid        |                      | d8-Arachidonic Acid | 16.89                | Negative                     | 279.4 > 261.2            | -38                  | -185                      |
| Acetaminophen       | NSAID             |                      | d4-Acetaminophen    | 1.81                 | Positive                     | 152.1 > 110.1            | 21                   | 60                        |
| d4-Acetaminophen    | SSTD              |                      | PHAU +esi           | 1.81                 | Positive                     | 156.1 > 114.1            | 21                   | 60                        |
| PHAU +esi           | ISTD              |                      |                     | 3.02                 | Positive                     | 251.2 > 114.1            | 21                   | 65                        |
| d4-PGF2a EA         | SSTD              |                      | PHAU +esi           | 3.56                 | Positive                     | 384.3 > 62.1             | 42                   | 50                        |
| PGF2a EA            | Acylethanolamide  | C20:4n6              | d4-PGF2a EA         | 3.56                 | Positive                     | 380.3 > 62.1             | 39                   | 45                        |
| PGE2 EA             | Acylethanolamide  | C20:4n6              | d4-PGF2a EA         | 3.59                 | Positive                     | 378.301 > 62.1           | 39                   | 65                        |
| PGD2 EA             | Acylethanolamide  | C20:4n6              | d4-PGF2a EA         | 3.91                 | Positive                     | 378.302 > 62.1           | 42                   | 65                        |
| PGF2a 1G            | Monoacylglycerol  | C20:4n6              | d4-PGF2a EA         | 4.19                 | Positive                     | 411.3 > 301.2            | 21                   | 40                        |
| PGE2 1G             | Monoacylglycerol  | C20:4n6              | d4-PGF2a EA         | 4.26                 | Positive                     | 409.3 > 317.2            | 21                   | 75                        |
| CUDA +esi           | ISTD              |                      |                     | 8.45                 | Positive                     | 341.3 > 216.2            | 24                   | 50                        |
| 15-HETE EA          | Acylethanolamide  | C20:4n6              | d8-AEA              | 9.55                 | Positive                     | 346.3 > 62.1             | 21                   | 75                        |
| 11,12-EpETRE EA     | Acylethanolamide  | C20:4n6              | d8-AEA              | 11.66                | Positive                     | 364.3 > 62.1             | 45                   | 75                        |
| aLEA                | Acylethanolamide  | C18:3n3              | d8-AEA              | 13.33                | Positive                     | 322.2 > 62.1             | 21                   | 60                        |

ISTD - Internal Standard. This compound is added to the samples at the reconstitution step

SSTD - Surrogate. This compound is added to the samples prior to extraction

## Supplemental Table S2

Supplemental Table S2B. UPLC/electrospray ionization QTrap analyte and instrument specific parameters for assayed oxylipins, nitrolipids, free fatty acids, endocannabinoids, and endocannabinoid-like compounds

| Lipid Mediator | Analyte Class    | Fatty Acid Precursor | Internal Standard | Retention Time (min) | Electrospray Ionization Mode | Q1 > Q3 Transition (m/z) | Collision Energy (V) | Decustering Potential (V) |
|----------------|------------------|----------------------|-------------------|----------------------|------------------------------|--------------------------|----------------------|---------------------------|
| DHEA           | Acylethanolamide | C22:6n3              | d8-AEA            | 14.50                | Positive                     | 372.3 > 62.1             | 45                   | 55                        |
| d8-NA-Gly      | SSTD             |                      | CUDA +esi         | 14.58                | Positive                     | 370.3 > 76.1             | 21                   | 45                        |
| d8-AEA         | SSTD             |                      | CUDA +esi         | 14.62                | Positive                     | 356.3 > 63.1             | 45                   | 50                        |
| NA-Gly         | Acylglycine      | C20:4n6              | d8-NA-Gly         | 14.64                | Positive                     | 362.3 > 76.1             | 21                   | 65                        |
| AEA            | Acylethanolamide | C20:4n6              | d8-AEA            | 14.68                | Positive                     | 348.3 > 62.1             | 39                   | 70                        |
| LEA            | Acylethanolamide | C18:2n6              | d8-AEA            | 14.79                | Positive                     | 324.2 > 62.1             | 21                   | 70                        |
| Dihomo GLA EA  | Acylethanolamide | C18:3n6              | d4-PEA            | 15.36                | Positive                     | 350.3 > 62.1             | 36                   | 35                        |
| d5-2-AG        | SSTD             |                      | CUDA +esi         | 15.42                | Positive                     | 384.3 > 287.2            | 21                   | 60                        |
| 2-AG           | Monoacylglycerol | C20:4n6              | d5-2-AG           | 15.43                | Positive                     | 379.301 > 287.2          | 24                   | 110                       |
| 2-LG           | Monoacylglycerol | C18:2n6              | d8-NA-Gly         | 15.49                | Positive                     | 355.301 > 263.2          | 12                   | 25                        |
| d4-PEA         | SSTD             |                      | CUDA +esi         | 15.60                | Positive                     | 304.2 > 62.1             | 18                   | 90                        |
| PEA            | Acylethanolamide | C16:0                | d4-PEA            | 15.62                | Positive                     | 300.2 > 62.1             | 18                   | 70                        |
| 1-AG           | Monoacylglycerol | C20:4n6              | d5-2-AG           | 15.66                | Positive                     | 379.302 > 287.2          | 21                   | 95                        |
| 1-LG           | Monoacylglycerol | C18:2n6              | d5-2-AG           | 15.81                | Positive                     | 355.302 > 263.2          | 12                   | 40                        |
| NO-Gly         | Acylglycine      | C18:1n9              | d8-NA-Gly         | 15.95                | Positive                     | 340.2 > 76.2             | 21                   | 60                        |
| DEA            | Acylethanolamide | C22:4n6              | d5-2-AG           | 16.02                | Positive                     | 376.3 > 62.1             | 45                   | 105                       |
| OEA            | Acylethanolamide | C18:1n9              | d4-PEA            | 16.04                | Positive                     | 326.2 > 62.1             | 21                   | 105                       |
| 2-OG           | Monoacylglycerol | C18:1n9              | d5-2-AG           | 16.87                | Positive                     | 357.301 > 265.2          | 15                   | 50                        |
| 1-OG           | Monoacylglycerol | C18:1n9              | d5-2-AG           | 17.19                | Positive                     | 357.302 > 265.2          | 15                   | 55                        |
| SEA            | Acylethanolamide | C18:0                | d4-PEA            | 17.67                | Positive                     | 328.2 > 62.1             | 21                   | 100                       |

ISTD - Internal Standard. This compound is added to the samples at the reconstitution step

SSTD - Surrogate. This compound is added to the samples prior to extraction

**Supplemental Table S3**

**Supplemental Table S3.** List of analytes with common database identifiers.

| Common Abbreviation | Common Name                          | IUPAC Name                                                              | Analyte Class      | Fatty Acid Precursor | HMDB ID <sup>a</sup> | PubChem CID <sup>b</sup> | InChI Key <sup>c</sup>       |
|---------------------|--------------------------------------|-------------------------------------------------------------------------|--------------------|----------------------|----------------------|--------------------------|------------------------------|
| 9-HODE              | 9-hydroxyoctadecanoic acid           | (10E,12E)-9-hydroxyoctadeca-10,12-dienoic acid                          | Oxylipin - Alcohol | C18:2n6              | HMDB10223            | 5282945                  | NPDSHTNEKLQJQI-SIGMCEVSA-N   |
| 13-HODE             | 13-hydroxyoctadecadienoic acid       | (9Z,11E)-13-hydroxyoctadeca-9,11-dienoic acid                           | Oxylipin - Alcohol | C18:2n6              | HMDB04667            | 6443013                  | HNICUWMFWZBIFP-IRQZEAMPSA-N  |
| 9-HOTrE             | 9-hydroxyoctadecatrienoic acid       | (9E,11E,15Z)-9-hydroxyoctadeca-9,11,15-trienoic acid                    | Oxylipin - Alcohol | C18:3n3              | HMDB10224            | 53480359                 | YUPHIKSLGBATJK-OBKXPJAFSA-N  |
| 13-HOTrE            | 13-hydroxyoctadecatrienoic acid      | (9Z,11E,15Z)-13-hydroxyoctadeca-9,11,15-trienoic acid                   | Oxylipin - Alcohol | C18:3n3              | HMDB10203            | 10469728                 | KLLGGQNRTVBSU-JDTPQGGVSA-N   |
| 5-HETE              | 5-hydroxyeicosatetraenoic acid       | (6E,8Z,11Z,14Z)-5-hydroxycosa-6,8,11,14-tetraenoic acid                 | Oxylipin - Alcohol | C20:4n6              | HMDB11134            | 5280733                  | KGJJOYOSFUGPC-JGKLHWIESA-N   |
| 8-HETE              | 8-hydroxyeicosatetraenoic acid       | (5Z,9E,11Z,14Z)-8-hydroxycosa-5,9,11,14-tetraenoic acid                 | Oxylipin - Alcohol | C20:4n6              | HMDB04679            | 5283154                  | NLUNAYAEIJYXR-BVYOQERLCSA-N  |
| 9-HETE              | 9-hydroxyeicosatetraenoic acid       | (5E,7Z,11Z,14Z)-9-hydroxycosa-5,7,11,14-tetraenoic acid                 | Oxylipin - Alcohol | C20:4n6              | HMDB10222            | 5312978                  | KATOYYZUTNAWSA-DLJQUHEDSA-N  |
| 11-HETE             | 11-hydroxyeicosatetraenoic acid      | (5E,8Z,12Z,14Z)-11-hydroxycosa-5,8,12,14-tetraenoic acid                | Oxylipin - Alcohol | C20:4n6              | HMDB04682            | 5312981                  | GCZRCCHPLVMMJE-RSPKXIRXSA-N  |
| 12-HETE             | 12-hydroxyeicosatetraenoic acid      | (5E,8Z,10Z,14Z)-12-hydroxycosa-5,8,10,14-tetraenoic acid                | Oxylipin - Alcohol | C20:4n6              | HMDB06111            | 5312983                  | ZNHVWPKMFKADKW-FYMKONMSA-N   |
| 15-HETE             | 15-hydroxyeicosatetraenoic acid      | (5Z,8Z,11Z,13E)-15-hydroxycosa-5,8,11,13-tetraenoic acid                | Oxylipin - Alcohol | C20:4n6              | HMDB03876            | 5280724                  | JSFATNQLKRBCI-VAEKSGALSA-N   |
| 20-HETE             | 20-hydroxyeicosatetraenoic acid      | (5Z,8Z,11Z,14Z)-20-hydroxycosa-5,8,11,14-tetraenoic acid                | Oxylipin - Alcohol | C20:4n6              | HMDB05998            | 5283157                  | NNDIXBJHNLFIJP-DLTLTKWJSA-N  |
| 5-HEPE              | 5-Hydroxyeicosapentaenoic acid       | (6E,8Z,11Z,14Z,17Z)-5-hydroxycosa-6,8,11,14,17-pentaenoic acid          | Oxylipin - Alcohol | C20:5n3              | HMDB05081            | 6439678                  | FTAGROYQYQRHF-FCWZHQCSA-N    |
| 9-HEPE              | 9-Hydroxyeicosapentaenoic acid       | (5Z,7E,11Z,14Z,17Z)-9-hydroxycosa-5,7,11,14,17-pentaenoic acid          | Oxylipin - Alcohol | C20:5n3              | HMDB60053            | 5283187                  | OXOPDAZWPWFJE-FPRWAWDYSA-N   |
| 12-HEPE             | 12-Hydroxyeicosapentaenoic acid      | (5Z,8Z,10E,14Z,17Z)-12-hydroxycosa-5,8,10,14,17-pentaenoic acid         | Oxylipin - Alcohol | C20:5n3              | HMDB10202            | 10041593                 | MCRJLMXYVFDXLS-QGQKRVLSA-N   |
| 15-HEPE             | 15-Hydroxyeicosapentaenoic acid      | (5Z,8Z,11Z,13E,17Z)-16-hydroxycosa-5,8,11,13,17-pentaenoic acid         | Oxylipin - Alcohol | C20:5n3              | HMDB10209            | 53480357                 | UDXLGLBAJYTLZ-XBCQTNLSA-N    |
| 4-HdOHE             | 4-hydroxydocosahexaenoic acid        | (5E,7Z,10Z,13Z,16Z,19Z)-4-hydroxydocosa-5,7,10,13,16,19-hexaenoic acid  | Oxylipin - Alcohol | C22:6n3              | HMDB60049            | 53394255                 | IFRKCNPQVIJFAQ-UHFFFAOYSA-N  |
| 14-HdOHE            | 14-hydroxydocosahexaenoic acid       | (4Z,7Z,10Z,12E,16Z,19Z)-14-hydroxydocosa-4,7,10,12,16,19-hexaenoic acid | Oxylipin - Alcohol | C22:6n3              | HMDB60044            | 11566378                 | ZNEBXONKCYFJAF-BGKMTWLOSA-N  |
| 17-HdOHE            | 17-hydroxydocosahexaenoic acid       | (4Z,7Z,10Z,13Z,15E,19Z)-17-hydroxydocosa-4,7,10,13,15,19-hexaenoic acid | Oxylipin - Alcohol | C22:6n3              | HMDB10213            | 6439179                  | SWTYBBUEPPYCX-VIIQJXSXA-N    |
| 9,10-e-DIHO         | 9,10-dihydroxyoctadecanoic acid      | 9,10-dihydroxyoctadecanoic acid                                         | Oxylipin - Diol    | C18:0                | -                    | 441460                   | VACHUYIREGFMSP-SJORKVTESA-N  |
| 9,10-DIHOME         | 9,10-dihydroxyoctadecenoic acid      | (Z)-9,10-dihydroxyoctadec-12-enoic acid                                 | Oxylipin - Diol    | C18:2n6              | HMDB04704            | 9966640                  | XEBKQSGNGRGDW-YFHOOESVSA-N   |
| 12,13-DIHOME        | 12,13-dihydroxyoctadecenoic acid     | (Z)-12,13-dihydroxyoctadec-9-enoic acid                                 | Oxylipin - Diol    | C18:2n6              | HMDB04705            | 10236635                 | CQSLTKIXAJTQGA-FLIBITNWSA-N  |
| 9,10-DIHODE         | 9,10-dihydroxyoctadecadienoic acid   | (12Z,15Z)-9,10-dihydroxyoctadeca-12,15-dienoic acid                     | Oxylipin - Diol    | C18:3n3              | HMDB10221            | 16061066                 | QRHSEDZBZMPOA-ZJSQCTGTSA-N   |
| 12,13-DIHODE        | 12,13-dihydroxyoctadecadienoic acid  | (9Z,15Z)-12,13-dihydroxyoctadeca-9,15-dienoic acid                      | Oxylipin - Diol    | C18:3n3              | HMDB10201            | 16061067                 | RGRKFRKRAFZJQMS-OOHFSOINSA-N |
| 15,16-DIHODE        | 15,16-dihydroxyoctadecadienoic acid  | (9Z,12Z)-15,16-dihydroxyoctadeca-9,12-dienoic acid                      | Oxylipin - Diol    | C18:3n3              | HMDB10208            | 16061068                 | LKLLJYTYPPVICID-SHPMOLHNSA-N |
| 5,6-DIHETrE         | 5,6-dihydroxyeicosatrienoic acid     | (8Z,11Z,14Z)-5,6-dihydroxycosa-8,11,14-trienoic acid                    | Oxylipin - Diol    | C20:4n6              | HMDB02343            | 5283142                  | GFNYAPAJUNPMGH-QNEBEIHSSA-N  |
| 8,9-DIHETrE         | 8,9-dihydroxyeicosatrienoic acid     | (5Z,11Z,14Z)-8,9-dihydroxycosa-5,11,14-trienoic acid                    | Oxylipin - Diol    | C20:4n6              | HMDB02311            | 5283144                  | DCJBINATHQHPKO-TYAUOURKSA-N  |
| 11,12-DIHETrE       | 11,12-dihydroxyeicosatrienoic acid   | (5Z,8Z,14Z)-11,12-dihydroxycosa-5,8,14-trienoic acid                    | Oxylipin - Diol    | C20:4n6              | HMDB02314            | 5283146                  | LRRPQRCHCFPPE-KROJNAHFSAN    |
| 14,15-DIHETrE       | 14,15-dihydroxyeicosatrienoic acid   | (5Z,8Z,11Z)-14,15-dihydroxycosa-5,8,11-trienoic acid                    | Oxylipin - Diol    | C20:4n6              | HMDB02265            | 5283147                  | SYAWGTIVOGZUMM-ILYOTBPNSA-N  |
| 5,15-DIHETE         | 5,15-dihydroxyeicosatetraenoic acid  | (6E,8Z,11Z,13E)-5,15-dihydroxycosa-6,8,11,13-tetraenoic acid            | Oxylipin - Diol    | C20:5n3              | HMDB10216            | 5283158                  | UXGXCGPWGSUMNI-BVHTXILBSA-N  |
| 8,15-DIHETE         | 8,15-dihydroxyeicosatetraenoic acid  | (5Z,9E,11Z,13E)-8,15-dihydroxycosa-5,9,11,13-tetraenoic acid            | Oxylipin - Diol    | C20:5n3              | HMDB10219            | 53480358                 | NNPWKRSRGORTIM-RCDCWQWQHSAN  |
| 14,15-DIHETE        | 14,15-dihydroxyeicosatetraenoic acid | (5Z,8Z,11Z,17Z)-14,15-dihydroxycosa-5,8,11,17-tetraenoic acid           | Oxylipin - Diol    | C20:5n3              | HMDB10204            | 16061119                 | BLWCDFIELVFRJY-QXBXTPPVSA-N  |
| 17,18-DIHETE        | 17,18-dihydroxyeicosatetraenoic acid | (5Z,8Z,11Z,14Z)-17,18-dihydroxycosa-5,8,11,14-tetraenoic acid           | Oxylipin - Diol    | C20:5n3              | HMDB10211            | 16061120                 | XYDVGNQAQQWFZEF-JPURVOHMSA-N |

<sup>a</sup> Compound identification number for the Human Metabolome Database (<http://www.hmdb.ca/>). Analytes not listed in the Human Metabolome Database are designated with "-".

<sup>b</sup> Compound identification number for the National Center for Biotechnology Information's PubChem database (<https://pubchem.ncbi.nlm.nih.gov/>)

<sup>c</sup> IUPAC International Chemical Identifier

<sup>d</sup> This analyte represents the sum of the peaks of all observed isomers of the linoleate-derived triols. Concentrations are calculated relative to concentrations of authentic 9,12,13-TriHOME standards, the nomenclature of which is shown here

**Supplemental Table S3**

**Supplemental Table S3.** List of analytes with common database identifiers.

| Common Abbreviation | Common Name                            | IUPAC Name                                                                                    | Analyte Class            | Fatty Acid Precursor | HMDB ID <sup>a</sup> | PubChem CID <sup>b</sup> | InChI Key <sup>c</sup>        |
|---------------------|----------------------------------------|-----------------------------------------------------------------------------------------------|--------------------------|----------------------|----------------------|--------------------------|-------------------------------|
| 19,20-DiHDoPE       | 19,20-dihydroxydocosapentaenoic acid   | (4Z,7Z,10Z,13Z,16Z)-19,20-dihydroxydocosa-4,7,10,13,16-pentaenoic acid                        | Oxylipin – Diol          | C22:6n3              | HMDB10214            | 16061148                 | FFXKPSNQCPCPNORO-MBYQGORISA-N |
| 9,10-EpOME          | 9,10-epoxyoctadecenoic acid            | 8-[3-[(E)-oct-2-enyl]oxiran-2-yl]octanoic acid                                                | Oxylipin – Epoxide       | C18:2n6              | HMDB04704            | 5283018                  | FBUKMFOXZMRGRB-JXMRGWBWSA-N   |
| 12,13-EpOME         | 12,13-epoxyoctadecenoic acid           | (Z)-11-(3-pentylloxiran-2-yl)undec-9-enoic acid                                               | Oxylipin – Epoxide       | C18:2n6              | HMDB04702            | 5356421                  | CCPPLLJZDQAOHD-FLIBITNWSA-N   |
| 9,10-EpODE          | 9,10-epoxyoctadecadienoic acid         | 8-[3-[(2Z,5Z)-octa-2,5-dienyl]oxiran-2-yl]octanoic acid                                       | Oxylipin – Epoxide       | C18:3n3              | HMDB10220            | 16061060                 | JTEGNHWOIJBIZ-ZJSQCTGTSA-N    |
| 12,13-EpODE         | 12,13-epoxyoctadecadienoic acid        | (Z)-11-[3-[(Z)-pent-2-enyl]oxiran-2-yl]undec-9-enoic acid                                     | Oxylipin – Epoxide       | C18:3n3              | HMDB10200            | 16061061                 | BKGKUSHPCTUGE-OOHFSOINSA-N    |
| 15,16-EpODE         | 15,16-epoxyoctadecadienoic acid        | (9Z,12Z)-14-(3-ethylloxiran-2-yl)tetradeca-9,12-dienoic acid                                  | Oxylipin – Epoxide       | C18:3n3              | HMDB10206            | 16061062                 | HKSDVYJONLXYKL-OHPMOLHNSA-N   |
| 8,9-EpETrE          | 8,9-epoxyeicosatrienoic acid           | (Z)-7-[3-[(2Z,5Z)-undeca-2,5-dienyl]oxiran-2-yl]hept-5-enoic acid                             | Oxylipin – Epoxide       | C20:4n6              | HMDB02232            | 5283203                  | DBWQSCSXHFNTMO-TYAUOURKSA-N   |
| 11,12-EpETrE        | 11,12-epoxyeicosatrienoic acid         | (5E,8Z)-10-[3-[(E)-oct-2-enyl]oxiran-2-yl]deca-5,8-dienoic acid                               | Oxylipin – Epoxide       | C20:4n6              | HMDB10409            | 53480479                 | DXOYQVHGIOESM-ICQCFVSKSA-N    |
| 14,15-EpETrE        | 14,15-epoxyeicosatrienoic acid         | (5Z,8Z,12E)-11-hydroxy-13-(3-pentylloxiran-2-yl)trideca-5,8,12-trienoic acid                  | Oxylipin – Epoxide       | C20:4n6              | HMDB04693            | 11954058                 | WLMZMBKVRPUYIG-LTCHCNXGSA-N   |
| 11,12-EpETE         | 11,12-epoxyeicosatetraenoic acid       | (5Z,8Z)-10-[3-[(2Z,5Z)-octa-2,5-dienyl]oxiran-2-yl]deca-5,8-dienoic acid                      | Oxylipin – Epoxide       | C20:5n3              | -                    | 16061087                 | QHOKDYBJBDJGY-BVILWJSOJSA-N   |
| 14,15-EpETE         | 14,15-epoxyeicosatetraenoic acid       | (5Z,8Z,11Z)-13-[3-[(Z)-pent-2-enyl]oxiran-2-yl]trideca-5,8,11-trienoic acid                   | Oxylipin – Epoxide       | C20:5n3              | HMDB10205            | 16061088                 | RGXZYRZGZWDMI-QXBTPPYSA-N     |
| 17,18-EpETE         | 17,18-epoxyeicosatetraenoic acid       | (5Z,8Z,11Z,14Z)-16-(3-ethylloxiran-2-yl)hexadeca-5,8,11,14-tetraenoic acid                    | Oxylipin – Epoxide       | C20:5n3              | HMDB10212            | 16061089                 | GPQVVJQEBXAKBJ-JPURVOMHSA-N   |
| 16,17-EpDPE         | 16,17-epoxydocosapentaenoic acid       | (4Z,7Z,10Z,13Z)-15-[3-[(Z)-pent-2-enyl]oxiran-2-yl]pentadeca-4,7,10,13-tetraenoic acid        | Oxylipin – Epoxide       | C22:6n3              | HMDB13621            | 14392758                 | BCTXZWPBBLWCRV-ZYAFOMMDSA-N   |
| 19,20-EpDPE         | 19,20-epoxydocosapentaenoic acid       | (4Z,7Z,10Z,13Z,16Z)-18-(3-ethylloxiran-2-yl)octadeca-4,7,10,13,16-pentaenoic acid             | Oxylipin – Epoxide       | C22:6n3              | HMDB13620            | 11631565                 | OSXOPUBJJDUAOJ-MBYQGORISA-N   |
| 9-HpODE             | 9-hydroperoxyoctadecadienoic acid      | (10E,12Z)-9-hydroperoxyoctadeca-10,12-dienoic acid                                            | Oxylipin – Hydroperoxide | C18:2n6              | HMDB06940            | 6439847                  | JGUNZIWGNMBSM-ZJHFMPGASA-N    |
| 13-HpODE            | 13-hydroperoxyoctadecadienoic acid     | (9Z,11E)-13-hydroperoxyoctadeca-9,11-dienoic acid                                             | Oxylipin – Hydroperoxide | C18:2n6              | HMDB03871            | 5280720                  | JDSRHVSAMTSSN-IRQZEMPSA-N     |
| 5-HpETE             | 5-hydroperoxyeicosatetraenoic acid     | (6E,8Z,11Z,14Z)-5-hydroperoxyeicosa-6,8,11,14-tetraenoic acid                                 | Oxylipin – Hydroperoxide | C20:4n6              | HMDB11135            | 5283171                  | JNUUNQHXIOFDA-XTDASVJISA-N    |
| 12-HpETE            | 12-hydroperoxyeicosatetraenoic acid    | (5Z,8Z,10E,14Z)-12-hydroperoxyeicosa-5,8,10,14-tetraenoic acid                                | Oxylipin – Hydroperoxide | C20:4n6              | HMDB04243            | 5280892                  | ZIOZYRSDNLNNI-LQWMCKPYSA-N    |
| 15-HpETE            | 15-hydroperoxyeicosatetraenoic acid    | (5Z,8Z,11Z,13E)-15-hydroperoxyeicosa-5,8,11,13-tetraenoic acid                                | Oxylipin – Hydroperoxide | C20:4n6              | HMDB04244            | 5280893                  | BFWYTORDFIVKP-VAEKSGALSA-N    |
| 9-KODE              | 9-oxo-octadecadienoic acid             | (10E,12Z)-9-oxooctadeca-10,12-dienoic acid                                                    | Oxylipin – Ketone        | C18:2n6              | HMDB04669            | 9839084                  | LUZSWWYKKLTDHU-ZJHFMPGASA-N   |
| 13-KODE             | 13-oxo-octadecadienoic acid            | (9Z,11E)-13-oxooctadeca-9,11-dienoic acid                                                     | Oxylipin – Ketone        | C18:2n6              | HMDB04668            | 6446027                  | JHXAZBBVQSKJR-BSZOFBHSSA-N    |
| 12,13-Ep-9-KODE     | 9-oxo-12,13-epoxy-10-octadecenoic acid | (E)-9-oxo-11-(3-pentylloxiran-2-yl)undec-10-enoic acid                                        | Oxylipin – Ketone        | C18:3n3              | HMDB13623            | 5283007                  | RCMABBHQYMBYKV-BUHFSPPSA-N    |
| 5-KETE              | 5-oxo-eicosatetraenoic acid            | (6E,8Z,11Z,14Z)-5-oxoeicosa-6,8,11,14-tetraenoic acid                                         | Oxylipin – Ketone        | C20:4n6              | HMDB10217            | 5283159                  | MEASLHGILYBXFO-XTDASVJISA-N   |
| 15-KETE             | 15-oxo-eicosatetraenoic acid           | (5Z,8Z,11Z,13E)-15-oxoeicosa-5,8,11,13-tetraenoic acid                                        | Oxylipin – Ketone        | C20:4n6              | HMDB10210            | 5280701                  | YGJTUEISKATQSM-USWFWKISSA-N   |
| 6-trans-LTB4        | 6-trans-Leukotriene B4                 | (5S,6E,8E,10E,12R,14Z)-5,12-dihydroxyeicosa-6,8,10,14-tetraenoic acid                         | Oxylipin – Leukotriene   | C20:4n6              | HMDB05087            | 5283128                  | VNYSSYRCGWBLHG-UKNWISKWSA-N   |
| LTB4                | Leukotriene B4                         | (5S,6Z,8E,10E,12R,14Z)-5,12-dihydroxyeicosa-6,8,10,14-tetraenoic acid                         | Oxylipin – Leukotriene   | C20:4n6              | HMDB02886            | 5280492                  | VNYSSYRCGWBLHG-AMOLWHMGSA-N   |
| LTB5                | Leukotriene B5                         | (5S,6Z,8E,10E,12R,14Z,17Z)-5,12-dihydroxyeicosa-6,8,10,14,17-pentaenoic acid                  | Oxylipin – Leukotriene   | C20:5n3              | HMDB05073            | 5283125                  | BISQPGCQOHLHQ-HDNPQISLSA-N    |
| PGE1                | Prostaglandin E1                       | 7-[(1R,2R,3R)-3-hydroxy-2-[(E,3S)-3-hydroxyoct-1-enyl]-5-oxocyclopentyl]heptanoic acid        | Oxylipin – Prostanoid    | C20:3n6              | HMDB01442            | 5280723                  | GMVPRGQIOIIMI-DWKJMRDSA-N     |
| PGD2                | Prostaglandin D2                       | (Z)-7-[(1R,2R,5S)-5-hydroxy-2-[(E,3S)-3-hydroxyoct-1-enyl]-3-oxocyclopentyl]hept-5-enoic acid | Oxylipin – Prostanoid    | C20:4n6              | HMDB01403            | 448457                   | BHMBVRSPMRCGG-OUTUXVNSA-N     |
| PGE2                | Prostaglandin E2                       | (Z)-7-[(1R,2R,3R)-3-hydroxy-2-[(E,3S)-3-hydroxyoct-1-enyl]-5-oxocyclopentyl]hept-5-enoic acid | Oxylipin – Prostanoid    | C20:4n6              | HMDB01220            | 5280360                  | XEYBRNLFZDVAV-ARSRFYASSA-N    |
| 15-keto PGE2        | 15-keto Prostaglandin E2               | (Z)-7-[(1R,2R,3R)-3-hydroxy-5-oxo-2-[(E)-3-oxooct-1-enyl]cyclopentyl]hept-5-enoic acid        | Oxylipin – Prostanoid    | C20:4n6              | HMDB03175            | 5280719                  | YRTJDWRBKPZNV-KMXMBPPJSA-N    |
| 6-keto PGF1a        | 6-keto Prostaglandin F1alpha           | 7-[(1R,2R,3R,5S)-3,5-dihydroxy-2-[(E,3S)-3-hydroxyoct-1-enyl]cyclopentyl]-6-oxoheptanoic acid | Oxylipin – Prostanoid    | C20:4n6              | HMDB02886            | 5280888                  | KFGOFTHODYBSGM-ZUNNJQCSA-N    |

<sup>a</sup> Compound identification number for the Human Metabolome Database (<http://www.hmdb.ca/>). Analytes not listed in the Human Metabolome Database are designated with "-"

<sup>b</sup> Compound identification number for the National Center for Biotechnology Information's PubChem database (<https://pubchem.ncbi.nlm.nih.gov/>)

<sup>c</sup> IUPAC International Chemical Identifier

<sup>d</sup> This analyte represents the sum of the peaks of all observed isomers of the linoleate-derived triols. Concentrations are calculated relative to concentrations of authentic 9,12,13-TriHOME standards, the nomenclature of which is shown here

Supplemental Table S3

Supplemental Table S3. List of analytes with common database identifiers.

| Common Abbreviation       | Common Name                                  | IUPAC Name                                                                                                     | Analyte Class         | Fatty Acid Precursor | HMDB ID <sup>a</sup> | PubChem CID <sup>b</sup> | InChI Key <sup>c</sup>       |
|---------------------------|----------------------------------------------|----------------------------------------------------------------------------------------------------------------|-----------------------|----------------------|----------------------|--------------------------|------------------------------|
| PGF2a                     | Prostaglandin F2alpha                        | (Z)-7-[(1R,2R,3R,5S)-3,5-dihydroxy-2-[(E,3S)-3-hydroxyoct-1-enyl]cyclopentyl]hept-5-enoic acid                 | Oxylipin - Prostanoid | C20:4n6              | HMDB01139            | 5280363                  | PXGLTODNUVUGFL-YNNPVMVKQSA-N |
| 15-deoxy PGJ2             | 15-deoxy Prostaglandin J2                    | (Z)-7-[(1S,5E)-5-[(E)-oct-2-enylidene]-4-oxocyclopent-2-en-1-yl]hept-5-enoic acid                              | Oxylipin - Prostanoid | C20:4n6              | HMDB05079            | 5311211                  | VHRUMKCAEVRRUBK-GODQJPCRSA-N |
| TXB2                      | Thromboxane B2                               | (Z)-7-[(2R,3S,4S)-4,6-dihydroxy-2-[(E,3S)-3-hydroxyoct-1-enyl]oxan-3-yl]hept-5-enoic acid                      | Oxylipin - Prostanoid | C20:4n6              | HMDB03252            | 5283137                  | XNRNNGPBEPNAR-JQBLCGNGSA-N   |
| PGE3                      | Prostaglandin E3                             | (Z)-7-[(1R,2R,3R)-3-hydroxy-2-[(E,3S,5Z)-3-hydroxyocta-1,5-dienyl]-5-oxocyclopentyl]hept-5-enoic acid          | Oxylipin - Prostanoid | C20:5n3              | HMDB02664            | 5280937                  | CBOMORHDONZRN-QLOYDKTKSA-N   |
| PGF3a                     | Prostaglandin F3alpha                        | (Z)-7-[(1R,2R,3R,5S)-3,5-dihydroxy-2-[(E,3S,5Z)-3-hydroxyocta-1,5-dienyl]cyclopentyl]hept-5-enoic acid         | Oxylipin - Prostanoid | C20:5n3              | -                    | 5280940                  | SAKGBZWAIABSY-SAMSIYEGSA-N   |
| Sum TriHOMEs <sup>d</sup> | 9,12,13-Trihydroxyoctadecenoic acid          | (10E)-9,12,13-trihydroxyoctadec-10-enoic acid                                                                  | Oxylipin - Triol      | C18:2n6              | HMDB04708            | 9858729                  | MDIUMSLCVYJBCQ-MVFSOIOZSA-N  |
| LXA4                      | Lipoxin A4                                   | (5S,6R,7E,9E,11Z,13E,15S)-5,6,15-trihydroxyicoso-7,9,11,13-tetraenoic acid                                     | Oxylipin - Triol      | C20:4n6              | HMDB04385            | 5280914                  | IXAQOZQEOGMIQS-SSQFXEBMSA-N  |
| RvD1                      | Resolvin D1                                  | (4Z,7S,9E,11E,13Z,15E,17S,19Z)-7,8,17-trihydroxydocosa-4,9,11,13,15,19-hexaenoic acid                          | Oxylipin - Triol      | C22:6n3              | HMDB03733            | 16061135                 | OIWTWACQMDFHJG-NJQZAZPPSA-N  |
| 9-Nitrooleate             | 9-Nitrooleic acid                            | 9-nitrooctadec-9-enoic acid                                                                                    | Nitrolipid            | C18:1n9              | -                    | 5341232                  | CQOAKBYRRVHWKQ-UHFFFAOYSA-N  |
| 10-Nitrooleate            | 10-Nitrooleic acid                           | 10-nitrooctadec-9-enoic acid                                                                                   | Nitrolipid            | C18:1n9              | -                    | 53394576                 | WRADPCFZZWXOTI-UHFFFAOYSA-N  |
| 10-Nitrolinoleate         | 10-Nitrolinoleic acid                        | (9E,12Z)-10-nitrooctadeca-9,12-dienoic acid                                                                    | Nitrolipid            | C18:2n6              | -                    | 5282259                  | LELVHAQTWXTCLY-XYWKAQWSA-N   |
| C18:2n6                   | Linoleic Acid                                | (9Z,12Z)-octadeca-9,12-dienoic acid                                                                            | Free Fatty Acid       |                      | HMDB00673            | 5280450                  | OYHQOLUKZRVURQ-HZJYTRNSA-N   |
| C18:3n3                   | alpha-Linolenic Acid                         | (9Z,12Z,15Z)-octadeca-9,12,15-trienoic acid                                                                    | Free Fatty Acid       |                      | HMDB01388            | 5280934                  | DTOSIQBPPRVQHS-PDBXOOCBSA-N  |
| C20:4n6                   | Arachidonic Acid                             | (5Z,8Z,11Z,14Z)-icosa-5,8,11,14-tetraenoic acid                                                                | Free Fatty Acid       |                      | HMDB01043            | 444899                   | YZXBAPSDXZZRQB-DOFZRALJSA-N  |
| C20:5n3                   | Eicosapentaenoic Acid                        | (5Z,8Z,11Z,14Z,17Z)-icosa-5,8,11,14,17-pentaenoic acid                                                         | Free Fatty Acid       |                      | HMDB01999            | 446284                   | JAZBEHYOPTENJ-JLNKQSITSA-N   |
| C22:6n3                   | Docosahexanoic Acid                          | (4Z,7Z,10Z,13Z,16Z,19Z)-docosa-4,7,10,13,16,19-hexaenoic acid                                                  | Free Fatty Acid       |                      | HMDB62579            | 445580                   | MBMBGCFQFBJSGT-KUBAVDMBSA-N  |
| PEA                       | Palmitoylethanolamide                        | N-(2-hydroxyethyl)hexadecanamide                                                                               | Acylethanolamide      | C16:0                | HMDB02100            | 4671                     | HXYVTAGFYLMHSO-UHFFFAOYSA-N  |
| SEA                       | Stearoylethanolamide                         | N-(2-hydroxyethyl)octadecanamide                                                                               | Acylethanolamide      | C18:0                | HMDB13078            | 27902                    | OTGQIQTPXJQRG-UHFFFAOYSA-N   |
| OEA                       | Oleoylethanolamide                           | (Z)-N-(2-hydroxyethyl)octadec-9-enamide                                                                        | Acylethanolamide      | C18:1n9              | HMDB02088            | 5283454                  | BOWVQLFMWHZBEF-KTKRTIGZSA-N  |
| LEA                       | Linoleoylethanolamide                        | (9Z,12Z)-N-(2-hydroxyethyl)octadeca-9,12-dienamide                                                             | Acylethanolamide      | C18:2n6              | HMDB12252            | 5283446                  | KQXDUGVSAQARU-HZJYTRNSA-N    |
| aLEA                      | alpha-Linolenylethanolamide                  | (9Z,12Z,15Z)-N-(2-hydroxyethyl)octadeca-9,12,15-trienamide                                                     | Acylethanolamide      | C18:3n3              | HMDB13624            | 5283449                  | HBJXRRXWHSZPU-PDBXOOCBSA-N   |
| Dihomo GLA EA             | Dihomo-gamma-linolenylethanolamide           | (8Z,11Z,14Z)-N-(2-hydroxyethyl)icosa-8,11,14-trienamide                                                        | Acylethanolamide      | C18:3n6              | HMDB13625            | 5282272                  | ULQWKETUACYZLI-QNEBEHSSA-N   |
| 11,12-EpETre EA           | 11,12-epoxyeicosatrienoic acid ethanolamide  | (5Z,8Z)-N-(2-hydroxyethyl)-10-[3-[(Z)-oct-2-enyl]oxiran-2-yl]deca-5,8-dienamide                                | Acylethanolamide      | C20:4n6              | HMDB13652            | 16061183                 | TYRRSRADDAROSO-KROJNAHPSA-N  |
| 15-HETE EA                | 15-hydroxyeicosatetraenoic acid ethanolamide | (5Z,8Z,11Z,13E,15S)-15-hydroxy-N-(2-hydroxyethyl)icosa-5,8,11,13-tetraenamide                                  | Acylethanolamide      | C20:4n6              | -                    | 91886095                 | XZQKRCUYLKDPEK-BPVVGGZHASA-N |
| AEA                       | Arachidonylethanolamide / Anandamide         | (5Z,8Z,11Z,14Z)-N-(2-hydroxyethyl)icosa-5,8,11,14-tetraenamide                                                 | Acylethanolamide      | C20:4n6              | HMDB04080            | 5281969                  | LGEQWQMCRQYKQ-DOFZRALJSA-N   |
| PGD2 EA                   | Prostaglandin D2 ethanolamide                | (Z)-N-(2-hydroxyethyl)-7-[(1R,2R,5S)-5-hydroxy-2-[(E,3S)-3-hydroxyoct-1-enyl]-3-oxocyclopentyl]hept-5-enamide  | Acylethanolamide      | C20:4n6              | HMDB13629            | 5283120                  | KEYDJKSQFDUAGF-YIRKRNQHSAN   |
| PGE2 EA                   | Prostaglandin E2 ethanolamide                | (Z)-N-(2-hydroxyethyl)-7-[(1R,2R,3R)-3-hydroxy-2-[(E,3S)-3-hydroxyoct-1-enyl]-5-oxocyclopentyl]hept-5-enamide  | Acylethanolamide      | C20:4n6              | -                    | 5283119                  | GKKWUSPPIQURFM-IGDGGSTLSA-N  |
| PGF2a EA                  | Prostaglandin F2alpha ethanolamide           | (E)-7-[(1R,2R,3R,5S)-3,5-dihydroxy-2-[(E,3S)-3-hydroxyoct-1-enyl]cyclopentyl]-N-(2-hydroxyethyl)hept-5-enamide | Acylethanolamide      | C20:4n6              | HMDB13628            | 53481911                 | XCVCLJZZCGEMU-FPLRWIMGSA-N   |
| DEA                       | Docosatetraenoylethanolamine                 | (7Z,10Z,13Z,16Z)-N-(2-hydroxyethyl)docosa-7,10,13,16-tetraenamide                                              | Acylethanolamide      | C22:4n6              | HMDB13626            | 5282273                  | FMVHVRYFQIXOAF-DOFZRALJSA-N  |
| DHEA                      | Docosahexanoylethanolamide                   | 2-hydroxyethyl (4Z,7Z,10Z,13Z,16Z,19Z)-docosa-4,7,10,13,16,19-hexaenoate                                       | Acylethanolamide      | C22:6n3              | HMDB13627            | 53245830                 | CXWASNUDKUTFPQ-KUBAVDMBSA-N  |
| 1-OG                      | 1-oleoylglycerol                             | 2,3-dihydroxypropyl (Z)-octadec-9-enoate                                                                       | Monoacylglycerol      | C18:1n9              | HMDB11567            | 12178130                 | RZRNYUHVWFMPQ-QJRAZLAKSA-N   |
| 2-OG                      | 2-oleoylglycerol                             | 1,3-dihydroxypropan-2-yl (Z)-octadec-9-enoate                                                                  | Monoacylglycerol      | C18:1n9              | HMDB11537            | 5319879                  | UPWQKDVUAURUGE-KTKRTIGZSA-N  |

<sup>a</sup> Compound identification number for the Human Metabolome Database (<http://www.hmdb.ca/>). Analytes not listed in the Human Metabolome Database are designated with "-"

<sup>b</sup> Compound identification number for the National Center for Biotechnology Information's PubChem database (<https://pubchem.ncbi.nlm.nih.gov/>)

<sup>c</sup> IUPAC International Chemical Identifier

<sup>d</sup> This analyte represents the sum of the peaks of all observed isomers of the linoleate-derived triols. Concentrations are calculated relative to concentrations of authentic 9,12,13-TriHOME standards, the nomenclature of which is shown here

**Supplemental Table S3**

**Supplemental Table S3.** List of analytes with common database identifiers.

| Common Abbreviation | Common Name                      | IUPAC Name                                                                                                           | Analyte Class                        | Fatty Acid Precursor | HMDB ID <sup>a</sup> | PubChem CID <sup>b</sup> | InChI Key <sup>c</sup>       |
|---------------------|----------------------------------|----------------------------------------------------------------------------------------------------------------------|--------------------------------------|----------------------|----------------------|--------------------------|------------------------------|
| 1-LG                | 1-linoleoylglycerol              | 2,3-dihydroxypropyl (9Z,12Z)-octadeca-9,12-dienoate                                                                  | Monoacylglycerol                     | C18:2n6              | HMDB11568            | 6436630                  | WECGLUPZRHILCT-GSNKQCJSSA-N  |
| 2-LG                | 2-linoleoylglycerol              | 1,3-dihydroxypropan-2-yl (9Z,12Z)-octadeca-9,12-dienoate                                                             | Monoacylglycerol                     | C18:2n6              | HMDB11538            | 5365676                  | IEPGNWMPIFDNSD-HZJYTRRNSA-N  |
| 1-AG                | 1-arachidonoylglycerol           | 2,3-dihydroxypropyl (5Z,8Z,11Z,14Z)-icosa-5,8,11,14-tetraenoate                                                      | Monoacylglycerol                     | C20:4n6              | HMDB11578            | 16019980                 | DCPCOKIYJYGMND-HUDVFFLJSA-N  |
| 2-AG                | 2-arachidonoylglycerol           | 1,3-dihydroxypropan-2-yl (5Z,8Z,11Z,14Z)-icosa-5,8,11,14-tetraenoate                                                 | Monoacylglycerol                     | C20:4n6              | HMDB04666            | 5282280                  | RCRCBTLHCHWDZ-DOFZRALJSA-N   |
| PGE2 1G             | Prostaglandin E2 1-glycerol      | [(2R)-2,3-dihydroxypropyl] (Z)-7-[(1R,2R,3S)-3-hydroxy-2-[(E,3S)-3-hydroxyoct-1-enyl]-5-oxocyclopentyl]hept-5-enoate | Monoacylglycerol                     | C20:4n6              | HMDB13043            | 52193688                 | RJXYVMSQBYEHN-SDTVLRMPNSA-N  |
| PGF2a 1G            | Prostaglandin F2alpha 1-glycerol | 2,3-dihydroxypropyl (Z)-7-[(1R,2R,3R,5S)-3,5-dihydroxy-2-[(E,3S)-3-hydroxyoct-1-enyl]cyclopentyl]hept-5-enoate       | Monoacylglycerol                     | C20:4n6              | -                    | 24778485                 | NWKPOVHSHWJQNI-OMVDPNNKSA-N  |
| NO-Gly              | N-oleoylglycine                  | 2-[[Z]-octadec-9-enoyl]amino]acetic acid                                                                             | Acylglycine                          | C18:1n9              | HMDB13631            | 6436908                  | HPFXACZRFJDURI-KTKRTIGZSA-N  |
| NA-Gly              | N-arachidonoylglycine            | 2-[[[5Z,8Z,11Z,14Z]-icosa-5,8,11,14-tetraenoyl]amino]acetic acid                                                     | Acylglycine                          | C20:4n6              | HMDB05096            | 5283389                  | YLEARPUNMCCCKMP-DOFZRALJSA-N |
| ASA                 | Aspirin                          | 2-(acetyloxy)benzoic acid                                                                                            | Non-Steroidal Anti-Inflammatory Drug |                      | HMDB0001879          | 2244                     | BSYNRYMUTXBXSQ-UHFFFAOYSA-N  |
| APAP                | Acetaminophen / Paracetamol      | N-(4-hydroxyphenyl)acetamide                                                                                         | Non-Steroidal Anti-Inflammatory Drug |                      | HMDB0001859          | 1983                     | RZVAJINKPMORJF-UHFFFAOYSA-N  |
| DIC                 | Diclofenac                       | 2-[2-[(2,6-dichlorophenyl)amino]phenyl]acetic acid                                                                   | Non-Steroidal Anti-Inflammatory Drug |                      | HMDB0014724          | 3033                     | DCOPUUMTXDBNB-UHFFFAOYSA-N   |
| IBU / IBP           | Ibuprofen                        | 2-[4-(2-methylpropyl)phenyl]propanoic acid                                                                           | Non-Steroidal Anti-Inflammatory Drug |                      | HMDB0001925          | 3672                     | HEFNWWSXWATRW-UHFFFAOYSA-N   |
| NAP / NP            | Naproxen                         | (2S)-2-(6-methoxynaphthalen-2-yl)propanoic acid                                                                      | Non-Steroidal Anti-Inflammatory Drug |                      | HMDB0001923          | 156391                   | CMWTZPSULFXJJA-VIFPVBQESA-N  |

<sup>a</sup> Compound identification number for the Human Metabolome Database (<http://www.hmdb.ca/>). Analytes not listed in the Human Metabolome Database are designated with "-"

<sup>b</sup> Compound identification number for the National Center for Biotechnology Information's PubChem database (<https://pubchem.ncbi.nlm.nih.gov/>)

<sup>c</sup> IUPAC International Chemical Identifier

<sup>d</sup> This analyte represents the sum of the peaks of all observed isomers of the linoleate-derived triols. Concentrations are calculated relative to concentrations of authentic 9,12,13-TriHOME standards, the nomenclature of which is shown here

**Supplemental Table S4**

**Supplemental Table S4.** Ibuprofen and detected lipid mediator concentrations in plasma and sweat at baseline and at three timepoints after oral administration of 400 mg ibuprofen to healthy male adult subjects (n = 9). All values are expressed as Geometric Mean [Range] and upper-case superscript letters indicate differences between group means as determined by linear mixed models with Tukey's post-hoc HSD.

| Lipid Mediator                  | Units            | Concentration in Plasma |                                |                                 |                                  |                |                | Concentration in Sweat            |                                   |                                   |                                  |                |                | Baseline (0 h) Concentration Correlation <sup>g</sup> |                |  |
|---------------------------------|------------------|-------------------------|--------------------------------|---------------------------------|----------------------------------|----------------|----------------|-----------------------------------|-----------------------------------|-----------------------------------|----------------------------------|----------------|----------------|-------------------------------------------------------|----------------|--|
|                                 |                  | 0 h <sup>a</sup>        | 0.5 h <sup>a</sup>             | 2 h <sup>a</sup>                | 4 h <sup>a</sup>                 | P <sup>e</sup> | q <sup>d</sup> | 0 h                               | 0.5 h                             | 2 h                               | 4h                               | P <sup>e</sup> | q <sup>d</sup> | Kendall's $\tau$                                      | P <sup>e</sup> |  |
| Ibuprofen                       | $\mu\text{g/mL}$ | ND <sup>A</sup>         | 18.8 [3.4 - 65.3] <sup>B</sup> | 48.3 [39.1 - 75.9] <sup>C</sup> | 33.8 [14.9 - 90.1] <sup>BC</sup> | < 0.0001       | < 0.0001       | ND                                | ND                                | ND                                | ND                               |                |                |                                                       |                |  |
| <b>Oxylipin - Prostaglandin</b> |                  |                         |                                |                                 |                                  |                |                |                                   |                                   |                                   |                                  |                |                |                                                       |                |  |
| PGE1                            | pmol/mL or nM    | 0.126 [0.04 - 0.421]    | 0.0867 [0.02 - 0.17]           | 0.152 [0.01 - 0.9]              | 0.158 [0.02 - 1.2]               | 0.6            | 0.7            | 0.453 [0.12 - 4.91]               | 0.343 [0.09 - 1.95]               | 0.394 [0.14 - 1.41]               | 0.413 [0.2 - 0.92]               | 0.9            | 0.6            | 0.296                                                 | 0.3            |  |
| PGE2                            | pmol/mL or nM    | 0.159 [0.06 - 0.6]      | 0.145 [0.02 - 0.51]            | 0.0893 [0.02 - 1.23]            | 0.219 [0.02 - 2.73]              | 0.6            | 0.7            | 2.71 [0.34 - 51.6] <sup>A</sup>   | 2.01 [0.67 - 22.2] <sup>AB</sup>  | 1.28 [0.15 - 12.9] <sup>AB</sup>  | 0.848 [0.37 - 3.24] <sup>B</sup> | 0.04           | 0.15           | 0.473                                                 | 0.1            |  |
| PGF2a                           | pmol/mL or nM    | 5.47 [1.43 - 23.7]      | 5.02 [1.13 - 22.7]             | 3.95 [0.07 - 18.3]              | 2.52 [0.08 - 17.2]               | 0.8            | 0.7            | ND                                | ND                                | ND                                | ND                               |                |                |                                                       |                |  |
| <b>Oxylipin - Alcohol</b>       |                  |                         |                                |                                 |                                  |                |                |                                   |                                   |                                   |                                  |                |                |                                                       |                |  |
| 13-HODE                         | pmol/mL or nM    | 23 [11.7 - 40.7]        | 19.2 [11.9 - 26.1]             | 22.9 [12.9 - 51.8]              | 32.6 [17.6 - 98.6]               | 0.1            | 0.3            | 21.9 [3.72 - 69.6]                | 23.6 [1.3 - 60.1]                 | 24.7 [0.62 - 86]                  | 26 [0.62 - 135]                  | 0.5            | 0.5            | 0.214                                                 | 0.5            |  |
| 9-HODE                          | pmol/mL or nM    | 8.77 [5.38 - 16]        | 6.91 [3.83 - 10.5]             | 8.48 [5.41 - 18.1]              | 12.8 [6.97 - 41.1]               | 0.07           | 0.3            | 7.72 [1.69 - 23.4]                | 8.16 [0.46 - 23.3]                | 8.04 [0.22 - 29.7]                | 9.24 [0.23 - 44.2]               | 0.5            | 0.5            | 0                                                     | 1              |  |
| 13-HOTE                         | pmol/mL or nM    | 1.56 [0.92 - 4.65]      | 1.36 [0.36 - 2.44]             | 1.37 [0.36 - 8.46]              | 2.94 [1.16 - 19.5]               | 0.1            | 0.3            | 1.08 [0.29 - 3.23]                | 0.988 [0.01 - 4.65]               | 1.38 [0.15 - 3.13]                | 1.84 [0.06 - 11]                 | 0.2            | 0.4            | -0.214                                                | 0.5            |  |
| 9-HOTE                          | pmol/mL or nM    | 1.19 [0.71 - 2.43]      | 0.916 [0.36 - 2.06]            | 1.14 [0.64 - 6.12]              | 1.45 [0.54 - 3.94]               | 0.5            | 0.6            | 1.08 [0.53 - 3.25]                | 1.11 [0.31 - 3.52]                | 0.957 [0.3 - 1.64]                | 1.4 [0.13 - 7.98]                | 0.7            | 0.6            | -0.473                                                | 0.1            |  |
| 20-HETE                         | pmol/mL or nM    | ND                      | ND                             | ND                              | ND                               |                |                | 0.742 [0.25 - 1.74] <sup>A</sup>  | 0.675 [0.23 - 1.3] <sup>AB</sup>  | 0.242 [0.02 - 0.76] <sup>B</sup>  | 0.792 [0.2 - 1.93] <sup>A</sup>  | 0.006          | 0.04           |                                                       |                |  |
| 15-HETE                         | pmol/mL or nM    | 0.861 [0.14 - 3.56]     | 0.828 [0.28 - 2.92]            | 1.15 [0.62 - 9.01]              | 1.75 [0.96 - 6.62]               | 0.2            | 0.4            | 0.311 [0.06 - 4.05]               | 0.302 [0.04 - 1.07]               | 0.541 [0.05 - 6.31]               | 0.352 [0.02 - 1.49]              | 0.2            | 0.3            | 0.074                                                 | 0.8            |  |
| 12-HETE                         | pmol/mL or nM    | 1.31 [0.66 - 6.38]      | 1.45 [0.54 - 3.18]             | 1.4 [0.81 - 2.92]               | 2.02 [1.05 - 6.66]               | 0.4            | 0.6            | 0.965 [0.52 - 1.7]                | 0.481 [0.11 - 1.8]                | 0.717 [0.27 - 1.61]               | 0.611 [0.17 - 1.49]              | 0.07           | 0.19           | 0.214                                                 | 0.5            |  |
| 11-HETE                         | pmol/mL or nM    | 0.408 [0.2 - 0.88]      | 0.276 [0.11 - 0.67]            | 0.324 [0.07 - 1.57]             | 0.305 [0.02 - 0.82]              | 0.8            | 0.7            | 0.0882 [0.01 - 0.39] <sup>A</sup> | 0.136 [0.01 - 0.34] <sup>AB</sup> | 0.152 [0.01 - 0.52] <sup>AB</sup> | 0.239 [0.11 - 0.81] <sup>B</sup> | 0.006          | 0.04           | 0                                                     | 1              |  |
| 8-HETE                          | pmol/mL or nM    | ND                      | ND                             | ND                              | ND                               |                |                | 0.0618 [0.01 - 0.18]              | 0.0596 [0.02 - 0.15]              | 0.0708 [0.01 - 0.27]              | 0.0772 [0.04 - 0.15]             | 0.5            | 0.5            |                                                       |                |  |
| 5-HETE                          | pmol/mL or nM    | 0.425 [0.02 - 1.86]     | 0.73 [0.12 - 3.49]             | 0.693 [0.37 - 1.41]             | 1.16 [0.42 - 2.19]               | 0.2            | 0.4            | 0.138 [0.04 - 0.36]               | 0.0932 [0.02 - 0.2]               | 0.138 [0.06 - 0.42]               | 0.0747 [0.01 - 0.49]             | 0.5            | 0.5            | -0.327                                                | 0.3            |  |
| 15-HEPE                         | pmol/mL or nM    | ND                      | ND                             | ND                              | ND                               |                |                | 0.0576 [0.00136 - 0.3]            | 0.0763 [0.03 - 0.13]              | 0.0934 [0.04 - 0.39]              | 0.0863 [0.02 - 0.3]              | 0.7            | 0.6            |                                                       |                |  |
| 12-HEPE                         | pmol/mL or nM    | ND                      | ND                             | ND                              | ND                               |                |                | 0.0781 [0.01 - 0.23]              | 0.0885 [0.02 - 0.25]              | 0.0801 [0.01 - 0.23]              | 0.0761 [0.01 - 0.27]             | 1              | 0.6            |                                                       |                |  |
| 17-HDoHE                        | pmol/mL or nM    | 2.55 [0.1 - 34.7]       | 1.71 [0.32 - 9.84]             | 3.08 [0.72 - 8.59]              | 3.9 [0.22 - 75]                  | 0.7            | 0.7            | 0.46 [0.09 - 7.41]                | 0.212 [0.13 - 0.9]                | 0.308 [0.05 - 1.59]               | 0.257 [0.03 - 0.7]               | 0.3            | 0.4            | 0.286                                                 | 0.3            |  |

<sup>a</sup> Due to LC-MS/MS injection failures in plasma samples, reported data are based on n = 8.

<sup>b</sup> Due to LC-MS/MS injection failures in plasma samples, reported data are based on n = 7.

<sup>c</sup> P value calculated by repeated measures linear mixed model ANOVA. Values are not adjusted for multiple comparisons.

<sup>d</sup> False discovery rate calculated according to the procedures of Storey and Tibshirani (2003). Q < 0.2 was considered acceptable for this study.

<sup>e</sup> Reported P values are not adjusted for multiple comparisons.

<sup>f</sup> Sum of the peaks of all observed isomers of the linoleate-derived triols. Concentrations were calculated relative to concentrations of authentic 9,12,13-TriHOME standards.

<sup>g</sup> Sum of the 1- and 2- isomers of each monoacylglyceride.



**Supplemental Table S4**

**Supplemental Table S4.** Ibuprofen and detected lipid mediator concentrations in plasma and sweat at baseline and at three timepoints after oral administration of 400 mg ibuprofen to healthy male adult subjects (n = 9). All values are expressed as Geometric Mean [Range] and upper-case superscript letters indicate differences between group means as determined by linear mixed models with Tukey's post-hoc HSD.

| Lipid Mediator            | Units         | Concentration in Plasma |                     |                     |                     |                |                | Concentration in Sweat |                      |                      |                     |                |                | Baseline (0 h) Concentration Correlation <sup>g</sup> |                |
|---------------------------|---------------|-------------------------|---------------------|---------------------|---------------------|----------------|----------------|------------------------|----------------------|----------------------|---------------------|----------------|----------------|-------------------------------------------------------|----------------|
|                           |               | 0 h <sup>a</sup>        | 0.5 h <sup>a</sup>  | 2 h <sup>a</sup>    | 4 h <sup>a</sup>    | P <sup>c</sup> | q <sup>d</sup> | 0 h                    | 0.5 h                | 2 h                  | 4h                  | P <sup>c</sup> | q <sup>d</sup> | Kendall's τ                                           | P <sup>e</sup> |
| <b>Oxylipin - Diol</b>    |               |                         |                     |                     |                     |                |                |                        |                      |                      |                     |                |                |                                                       |                |
| 9,10-e-DIHO               | pmol/mL or nM | 10.4 [5.76 - 34.1]      | 8.34 [4.37 - 27.8]  | 9.82 [4.88 - 47.7]  | 14.6 [6.5 - 89]     | 0.5            | 0.6            | 58.4 [39 - 135]        | 63.5 [28.1 - 196]    | 50.4 [24.9 - 97.7]   | 64.7 [9.99 - 256]   | 0.8            | 0.6            | -0.500                                                | 0.08           |
| 12,13-DIHOME              | pmol/mL or nM | 4.13 [2.24 - 10.4]      | 3.81 [2.08 - 7.22]  | 4.87 [2.36 - 13.8]  | 6.35 [3.26 - 19.2]  | 0.09           | 0.3            | 1.89 [0.9 - 3.6]       | 1.95 [0.92 - 3.16]   | 1.61 [0.54 - 3.72]   | 1.68 [0.21 - 5.64]  | 0.8            | 0.6            | -0.071                                                | 0.8            |
| 9,10-DIHOME               | pmol/mL or nM | 4.44 [1.44 - 12]        | 3.94 [1.71 - 8.71]  | 4.23 [2.46 - 9.76]  | 6.21 [3.22 - 16.9]  | 0.3            | 0.5            | 3.61 [1.85 - 7.66]     | 4.15 [2.79 - 8.1]    | 3.2 [1.25 - 7.56]    | 3.17 [0.56 - 10.5]  | 0.7            | 0.6            | -0.286                                                | 0.3            |
| 15,16-DIHODE              | pmol/mL or nM | 15 [6.96 - 37.5]        | 12.3 [6.37 - 30.6]  | 16.5 [10.7 - 57.5]  | 17.1 [8.77 - 54.7]  | 0.2            | 0.4            | 1.49 [0.43 - 5.65]     | 1.65 [0.42 - 4.04]   | 1.04 [0.18 - 3.3]    | 1.12 [0.12 - 7.01]  | 0.4            | 0.5            | -0.286                                                | 0.3            |
| 12,13-DIHODE              | pmol/mL or nM | 1.77 [0.3 - 7.52]       | 2.11 [0.43 - 8.95]  | 1.58 [0.3 - 27.6]   | 2.14 [0.85 - 35]    | 0.9            | 0.8            | 0.332 [0.12 - 1.34]    | 0.512 [0.1 - 1.53]   | 0.382 [0.09 - 0.91]  | 0.417 [0.04 - 3.55] | 0.6            | 0.5            | -0.357                                                | 0.2            |
| 9,10-DIHODE               | pmol/mL or nM | 0.458 [0.2 - 1.04]      | 0.409 [0.22 - 1.45] | 0.434 [0.2 - 3.16]  | 0.463 [0.11 - 1.22] | 1              | 0.8            | 0.35 [0.1 - 0.87]      | 0.416 [0.1 - 0.86]   | 0.319 [0.07 - 0.75]  | 0.327 [0.03 - 2]    | 0.8            | 0.6            | -0.473                                                | 0.1            |
| 14,15-DIHETE              | pmol/mL or nM | 1.17 [0.7 - 2.77]       | 1.18 [0.76 - 1.67]  | 1.29 [0.85 - 2.24]  | 1.45 [1.01 - 2.3]   | 0.4            | 0.6            | 0.341 [0.09 - 1.09]    | 0.479 [0.06 - 1.44]  | 0.396 [0.08 - 1.08]  | 0.433 [0.03 - 2.12] | 0.5            | 0.5            | -0.286                                                | 0.3            |
| 11,12-DIHETE              | pmol/mL or nM | 1.11 [0.56 - 3.09]      | 1.04 [0.69 - 1.8]   | 1.25 [0.62 - 4.92]  | 1.42 [0.71 - 4.52]  | 0.7            | 0.7            | 0.231 [0.07 - 1.02]    | 0.285 [0.06 - 0.99]  | 0.203 [0.08 - 0.51]  | 0.301 [0.02 - 1.37] | 0.5            | 0.5            | 0.036                                                 | 0.9            |
| 5,6-DIHETE                | pmol/mL or nM | 0.406 [0.06 - 1.04]     | 0.674 [0.26 - 1.84] | 0.507 [0.18 - 1.3]  | 0.871 [0.48 - 3.15] | 0.06           | 0.3            | 3.29 [1.28 - 10.7]     | 4.45 [0.83 - 11.9]   | 3.63 [1.65 - 7.42]   | 4.21 [0.42 - 17.3]  | 0.5            | 0.5            | -0.255                                                | 0.4            |
| 17,18-DIHETE              | pmol/mL or nM | 20.2 [7.4 - 33.2]       | 21.3 [10.7 - 47.4]  | 21.6 [10.2 - 82.4]  | 23.1 [12 - 116]     | 1              | 0.8            | 1.76 [0.31 - 6.72]     | 2.05 [0.32 - 6.38]   | 1.55 [0.48 - 4.67]   | 2.34 [0.14 - 8.72]  | 0.3            | 0.4            | -0.214                                                | 0.5            |
| 19,20-DIHDoPA             | pmol/mL or nM | 1.91 [0.76 - 4.13]      | 2.55 [1.34 - 4.13]  | 2.51 [1.52 - 5.23]  | 2.3 [0.99 - 5.61]   | 0.6            | 0.7            | ND                     | ND                   | ND                   | ND                  |                |                |                                                       |                |
| <b>Oxylipin - Triol</b>   |               |                         |                     |                     |                     |                |                |                        |                      |                      |                     |                |                |                                                       |                |
| Sum TriHOMEs <sup>f</sup> | pmol/mL or nM | 7.88 [4.64 - 12.2]      | 6.2 [4.66 - 9.33]   | 6.58 [3.96 - 14.1]  | 11.3 [4.71 - 115]   | 0.2            | 0.4            | 31.7 [11.4 - 93.5]     | 39.4 [8.65 - 100]    | 21.7 [9.23 - 55.6]   | 25.3 [7.25 - 71.6]  | 0.07           | 0.19           | 0.071                                                 | 0.8            |
| <b>Oxylipin - Epoxide</b> |               |                         |                     |                     |                     |                |                |                        |                      |                      |                     |                |                |                                                       |                |
| 9(10)-EpO                 | pmol/mL or nM | 9.96 [2.37 - 45.8]      | 8.28 [3.87 - 16.6]  | 4.92 [2.02 - 58.3]  | 13.2 [3.81 - 107]   | 0.1            | 0.3            | 2.81 [0.89 - 6.54]     | 2.35 [0.99 - 6.43]   | 1.55 [0.17 - 5.52]   | 3.07 [0.73 - 6.59]  | 0.2            | 0.4            | -0.214                                                | 0.5            |
| 12(13)-EpOME              | pmol/mL or nM | 4.1 [1.14 - 11.8]       | 3.49 [1.93 - 7.28]  | 3.68 [2.09 - 10.3]  | 4.73 [2.59 - 33.4]  | 0.9            | 0.8            | 0.485 [0.08 - 1.31]    | 0.822 [0.38 - 1.89]  | 0.759 [0.12 - 1.86]  | 0.831 [0.03 - 2.24] | 0.2            | 0.3            | -0.445                                                | 0.1            |
| 9(10)-EpOME               | pmol/mL or nM | 1.12 [0.26 - 4.7]       | 1.05 [0.22 - 3.35]  | 1.28 [0.57 - 7.99]  | 2.11 [0.57 - 19.1]  | 0.5            | 0.6            | 0.657 [0.16 - 1.93]    | 0.778 [0.08 - 2.47]  | 0.749 [0.04 - 2.92]  | 1.21 [0.08 - 4.49]  | 0.07           | 0.2            | -0.143                                                | 0.6            |
| 15(16)-EpODE              | pmol/mL or nM | 3.95 [0.95 - 11.3]      | 3.67 [1.22 - 9.12]  | 3.49 [1.36 - 14.1]  | 5.83 [2.53 - 56.5]  | 0.5            | 0.7            | 0.491 [0.04 - 4.5]     | 0.908 [0.16 - 2.55]  | 0.694 [0.21 - 4.97]  | 0.625 [0.04 - 2.62] | 0.6            | 0.5            | -0.143                                                | 0.6            |
| 12(13)-EpODE              | pmol/mL or nM | ND                      | ND                  | ND                  | ND                  |                |                | 0.0703 [0.02 - 0.14]   | 0.0696 [0.02 - 0.21] | 0.0959 [0.02 - 0.35] | 0.128 [0.04 - 0.5]  | 0.06           | 0.17           |                                                       |                |
| 9(10)-EpODE               | pmol/mL or nM | 1.02 [0.35 - 10.2]      | 0.926 [0.35 - 2.47] | 0.909 [0.25 - 13.9] | 1.37 [0.15 - 40.4]  | 0.9            | 0.8            | 0.194 [0.04 - 0.51]    | 0.302 [0.08 - 0.74]  | 0.172 [0.01 - 0.57]  | 0.278 [0.01 - 1.92] | 0.4            | 0.5            | 0                                                     | 1              |

<sup>a</sup> Due to LC-MS/MS injection failures in plasma samples, reported data are based on n = 8.

<sup>b</sup> Due to LC-MS/MS injection failures in plasma samples, reported data are based on n = 7.

<sup>c</sup> P value calculated by repeated measures linear mixed model ANOVA. Values are not adjusted for multiple comparisons.

<sup>d</sup> False discovery rate calculated according to the procedures of Storey and Tibshirani (2003). Q < 0.2 was considered acceptable for this study.

<sup>e</sup> Reported P values are not adjusted for multiple comparisons.

<sup>f</sup> Sum of the peaks of all observed isomers of the linoleate-derived triols. Concentrations were calculated relative to concentrations of authentic 9,12,13-TriHOME standards.

<sup>g</sup> Sum of the 1- and 2- isomers of each monoacylglyceride.

Supplemental Table S4

Supplemental Table S4. Ibuprofen and detected lipid mediator concentrations in plasma and sweat at baseline and at three timepoints after oral administration of 400 mg ibuprofen to healthy male adult subjects (n = 9). All values are expressed as Geometric Mean [Range] and upper-case superscript letters indicate differences between group means as determined by linear mixed models with Tukey's post-hoc HSD.

| Lipid Mediator                            | Units         | Concentration in Plasma          |                                    |                                   |                                  |                |                | Concentration in Sweat              |                                   |                                   |                                     |                |                | Baseline (0 h) Concentration Correlation <sup>g</sup> |                |
|-------------------------------------------|---------------|----------------------------------|------------------------------------|-----------------------------------|----------------------------------|----------------|----------------|-------------------------------------|-----------------------------------|-----------------------------------|-------------------------------------|----------------|----------------|-------------------------------------------------------|----------------|
|                                           |               | 0 h <sup>a</sup>                 | 0.5 h <sup>a</sup>                 | 2 h <sup>a</sup>                  | 4 h <sup>a</sup>                 | P <sup>c</sup> | q <sup>d</sup> | 0 h                                 | 0.5 h                             | 2 h                               | 4h                                  | P <sup>c</sup> | q <sup>d</sup> | Kendall's τ                                           | P <sup>e</sup> |
| <b>Oxylipin - Ketone</b>                  |               |                                  |                                    |                                   |                                  |                |                |                                     |                                   |                                   |                                     |                |                |                                                       |                |
| 13-KODE                                   | pmol/mL or nM | 1.89 [0.13 - 19.3]               | 1.66 [0.12 - 9.12]                 | 2.16 [0.43 - 51.1]                | 3.79 [0.35 - 37.2]               | 0.7            | 0.7            | 2.17 [0.3 - 13.2]                   | 3.32 [1.56 - 16.8]                | 2.62 [0.05 - 12.3]                | 2.69 [0.06 - 13.3]                  | 0.8            | 0.6            | -0.214                                                | 0.5            |
| 9-KODE                                    | pmol/mL or nM | 3.09 [0.67 - 15.7]               | 1.32 [0.02 - 5.24]                 | 1.62 [0.23 - 15.8]                | 3.42 [0.96 - 33.2]               | 0.4            | 0.6            | 5.35 [0.64 - 38.5]                  | 4.93 [0.45 - 30.5]                | 3.89 [0.04 - 16.7]                | 5.14 [0.11 - 24.3]                  | 0.8            | 0.6            | 0.071                                                 | 0.8            |
| 12(13)-Ep-9-KODE                          | pmol/mL or nM | ND                               | ND                                 | ND                                | ND                               |                |                | 1.82 [0.72 - 3.64]                  | 1.82 [0.53 - 5.54]                | 1.05 [0.34 - 1.94]                | 2.38 [0.5 - 12.9]                   | 0.2            | 0.3            |                                                       |                |
| <b>Nitrolipid</b>                         |               |                                  |                                    |                                   |                                  |                |                |                                     |                                   |                                   |                                     |                |                |                                                       |                |
| 10-Nitrooleate                            | pmol/mL or nM | ND                               | ND                                 | ND                                | ND                               |                |                | 1.78 [0.36 - 6.24]                  | 2.47 [0.13 - 31.5]                | 0.839 [0.09 - 6.06]               | 1.6 [0.24 - 9.37]                   | 0.2            | 0.4            |                                                       |                |
| 9-Nitrooleate                             | pmol/mL or nM | ND                               | ND                                 | ND                                | ND                               |                |                | 0.729 [0.09 - 3.76] <sup>h,i</sup>  | 1.68 [0.2 - 14.6] <sup>h</sup>    | 0.224 [0.05 - 2.57] <sup>a</sup>  | 0.751 [0.08 - 4.71] <sup>h,i</sup>  | 0.007          | 0.04           |                                                       |                |
| 10-Nitrolinoleate                         | pmol/mL or nM | ND                               | ND                                 | ND                                | ND                               |                |                | 0.297 [0.16 - 0.6]                  | 0.234 [0.05 - 2.32]               | 0.142 [0.04 - 0.44]               | 0.175 [0.01 - 0.89]                 | 0.4            | 0.5            |                                                       |                |
| <b>Endocannabinoid - Acylethanolamide</b> |               |                                  |                                    |                                   |                                  |                |                |                                     |                                   |                                   |                                     |                |                |                                                       |                |
| OEA                                       | pmol/mL or nM | 4.14 [2.83 - 8.65] <sup>A</sup>  | 4.33 [2.57 - 7.49] <sup>A</sup>    | 5.58 [3.71 - 8.99] <sup>A,B</sup> | 7.78 [3.42 - 21] <sup>B</sup>    | 0.004          | 0.04           | 0.586 [0.09 - 2.7] <sup>A</sup>     | 0.058 [0.01 - 0.81] <sup>B</sup>  | 0.0381 [0.01 - 0.13] <sup>B</sup> | 0.127 [0.01 - 0.25] <sup>B</sup>    | <0.0001        | <0.0001        | -0.214                                                | 0.5            |
| LEA                                       | pmol/mL or nM | 1.19 [0.67 - 1.95]               | 1.24 [0.65 - 1.78]                 | 1.26 [0.77 - 2.55]                | 1.95 [0.96 - 4.4]                | 0.06           | 0.2            | 0.0447 [0.01 - 0.22] <sup>A</sup>   | 0.0122 [0.01 - 0.03] <sup>B</sup> | 0.0177 [0.01 - 0.03] <sup>B</sup> | 0.0161 [0.01 - 0.04] <sup>B</sup>   | <0.0005        | 0.002          | 0.429                                                 | 0.1            |
| aLEA                                      | pmol/mL or nM | 0.0968 [0.04 - 0.29]             | 0.0949 [0.04 - 0.29]               | 0.113 [0.06 - 0.81]               | 0.166 [0.08 - 0.62]              | 0.3            | 0.5            | ND                                  | ND                                | ND                                | ND                                  |                |                |                                                       |                |
| Dihomo GLA EA                             | pmol/mL or nM | 0.168 [0.05 - 0.39] <sup>A</sup> | 0.204 [0.13 - 0.33] <sup>A,B</sup> | 0.174 [0.09 - 0.43] <sup>A</sup>  | 0.315 [0.22 - 0.43] <sup>B</sup> | 0.02           | 0.13           | ND                                  | ND                                | ND                                | ND                                  |                |                |                                                       |                |
| AEA                                       | pmol/mL or nM | 0.627 [0.29 - 0.92] <sup>A</sup> | 0.632 [0.41 - 0.95] <sup>A</sup>   | 0.653 [0.34 - 0.98] <sup>A</sup>  | 1 [0.62 - 2.58] <sup>B</sup>     | 0.004          | 0.04           | ND                                  | ND                                | ND                                | ND                                  |                |                |                                                       |                |
| DEA                                       | pmol/mL or nM | 0.298 [0.21 - 0.48]              | 0.276 [0.17 - 0.5]                 | 0.259 [0.13 - 0.45]               | 0.355 [0.17 - 1.14]              | 0.5            | 0.6            | ND                                  | ND                                | ND                                | ND                                  |                |                |                                                       |                |
| DHEA                                      | pmol/mL or nM | 0.76 [0.28 - 1.46]               | 0.837 [0.39 - 2.05]                | 0.942 [0.41 - 1.82]               | 1.23 [0.46 - 3.01]               | 0.07           | 0.3            | ND                                  | ND                                | ND                                | ND                                  |                |                |                                                       |                |
| <b>Endocannabinoid - Acylglycine</b>      |               |                                  |                                    |                                   |                                  |                |                |                                     |                                   |                                   |                                     |                |                |                                                       |                |
| NO-Gly                                    | pmol/mL or nM | 3.5 [1.62 - 9.44]                | 3.65 [1.68 - 5.93]                 | 5.09 [3.2 - 9]                    | 5.43 [2.81 - 21.9]               | 0.1            | 0.3            | 0.156 [0.01 - 0.55]                 | 0.132 [0.02 - 1.64]               | 0.0757 [0.02 - 0.23]              | 0.0918 [0.02 - 0.4]                 | 0.5            | 0.5            | 0.036                                                 | 0.9            |
| NA-Gly                                    | pmol/mL or nM | 0.833 [0.34 - 1.63]              | 0.55 [0.03 - 2.71]                 | 0.593 [0.41 - 0.87]               | 1.32 [0.51 - 5.7]                | 0.09           | 0.3            | 0.0627 [0.01 - 0.23] <sup>A,B</sup> | 0.103 [0.01 - 0.97] <sup>B</sup>  | 0.0222 [0.01 - 0.1] <sup>A</sup>  | 0.0486 [0.01 - 0.16] <sup>A,B</sup> | 0.05           | 0.16           | 0.109                                                 | 0.7            |
| <b>Endocannabinoid - Monoacylglycerol</b> |               |                                  |                                    |                                   |                                  |                |                |                                     |                                   |                                   |                                     |                |                |                                                       |                |
| OG <sup>f</sup>                           | pmol/mL or nM | 393 [212 - 702]                  | 365 [204 - 595]                    | 384 [173 - 1020]                  | 543 [185 - 8150]                 | 0.7            | 0.7            | 61.5 [2.67 - 5620]                  | 33.1 [4.61 - 3170]                | 26.3 [4.33 - 238]                 | 16.6 [1.14 - 406]                   | 0.3            | 0.4            | 0.071                                                 | 0.8            |
| LG <sup>f</sup>                           | pmol/mL or nM | 238 [67.6 - 820]                 | 215 [78.5 - 579]                   | 229 [126 - 661]                   | 243 [104 - 494]                  | 0.9            | 0.7            | 4.11 [0.46 - 21.2]                  | 4.09 [0.76 - 17.1]                | 4.55 [1.39 - 18.4]                | 2.16 [0.04 - 10.7]                  | 0.4            | 0.5            | 0.071                                                 | 0.8            |
| AG <sup>f</sup>                           | pmol/mL or nM | 20.7 [10 - 51.2]                 | 18.2 [10.6 - 46.5]                 | 17.7 [5.67 - 57.7]                | 18.6 [5.39 - 41]                 | 0.9            | 0.8            | 4.2 [0.15 - 836]                    | 3.5 [0.47 - 287]                  | 2.89 [0.26 - 22.4]                | 2.24 [0.08 - 33]                    | 0.8            | 0.6            | 0.143                                                 | 0.6            |

<sup>a</sup> Due to LC-MS/MS injection failures in plasma samples, reported data are based on n = 8.

<sup>b</sup> Due to LC-MS/MS injection failures in plasma samples, reported data are based on n = 7.

<sup>c</sup> P value calculated by repeated measures linear mixed model ANOVA. Values are not adjusted for multiple comparisons.

<sup>d</sup> False discovery rate calculated according to the procedures of Storey and Tibshirani (2003). q < 0.2 was considered acceptable for this study.

<sup>e</sup> Reported P values are not adjusted for multiple comparisons.

<sup>f</sup> Sum of the peaks of all observed isomers of the linoleate-derived triols. Concentrations were calculated relative to concentrations of authentic 9,12,13-TriHOME standards.

<sup>g</sup> Sum of the 1- and 2- isomers of each monoacylglyceride.
